1  
2  
3  
4  
5  
6  
7  
8  
9  
10  
11  
12  
13  
14  
15  
16  
17  
18  
19  
20  
21  
22

# Open-source low-cost cardiac optical mapping system

Rybashlykov D.<sup>1</sup>, Brennan J.<sup>2</sup>, Lin Z<sup>2</sup>., Efimov I.R.<sup>2,\*</sup>, Syunyaev R.<sup>1,#</sup>

<sup>1</sup>Human Physiology Lab, Moscow Institute of Physics and Technology, Moscow, Russia

<sup>2</sup>Department of Biomedical Engineering, The George Washington University, Washington DC, USA

\* Corresponding author 1

E-mail: [irefimov@gmail.com](mailto:irefimov@gmail.com)

# Corresponding author 2

E-mail: [roman.syunyaev@gmail.com](mailto:roman.syunyaev@gmail.com)

## 23 **Abstract**

24           Fluorescent imaging with voltage- or calcium-sensitive dyes, *i.e.* optical mapping, is  
25 one of the indispensable modern techniques to study cardiac electrophysiology, unsurpassed  
26 by temporal and spatial resolution. High-speed CMOS cameras capable of optical registration  
27 of action potential propagation are in general very costly. We present a complete solution  
28 priced below US\$1,000 (including camera and lens) at the moment of publication with an open-  
29 source image acquisition and processing software. We demonstrate that the iDS UI-3130CP  
30 rev.2 camera we used in this study is capable of 200x200 977 frames per second (FPS) action  
31 potential recordings from rodent hearts. The signal-to-noise-ratio of a conditioned signal was  
32  $16 \pm 10$  for rodent hearts. A comparison with a specialized MiCAM Ultimate-L camera has  
33 shown that signal-to-noise ratio (SNR) is sufficient for accurate measurements of AP waveform,  
34 conduction velocity ( $\pm 0.04$  m/s) and action potential duration ( $\pm 7$ ms) in mouse and rat hearts.  
35 We measured the action potential prolongation during 4-aminopyridine administration in  
36 mouse heart, showing that proposed system signal quality is adequate for drug studies.

## 37 **Introduction**

38           An optical technique of measurement of cellular transmembrane voltage *via*  
39 potentiometric dyes was introduced in the 1970s, known today as optical mapping [1-4].  
40 Potentiometric dye molecules bind to cell membranes and undergo either molecular motion or  
41 an electronic redistribution upon excitation and emission [5]. The changes of the external  
42 electrical field affect transition energy, corresponding emission spectrum can be detected and  
43 recorded. Further advances in the field include calcium-sensitive dyes (changing emission  
44 spectrum upon binding with calcium ions) [6], metabolic imaging (*via* intrinsic NADH  
45 fluorescence) [7], simultaneous mapping of voltage and calcium [8,9], simultaneous imaging  
46 from the several sides of the heart (panoramic mapping) [10,11], and transmural imaging via  
47 long wavelength dyes [12].

48           One particular advantage of optical mapping in comparison to traditional multielectrode  
49 arrays is high spatial and temporal resolution that makes it possible to accurately track the

50 rapidly propagating excitation wavefronts in ventricular and atrial arrhythmias [13]. However  
51 high spatio-temporal resolution requires highly specialized cameras: 100x100 pixels, 1,000  
52 frames per second (FPS) and digital image acquisition hardware. It typically has a high price  
53 of US\$50,000-100,000. This price is prohibitively high for education and some research  
54 applications, for example, several cameras are required for multiparametric and panoramic  
55 optical mapping. Recently, high speed USB 3.0 computer vision-specialized industrial CMOS  
56 cameras entered the mass market eliminating the need for specialized data-acquisition systems  
57 and, thus, reducing the price of a fast imaging system. Previously, Lee et al. [14] have  
58 demonstrated that it is possible to optically map pig and rabbit hearts with relatively  
59 inexpensive (\$600-1200) CMOS cameras, as it was possible with inexpensive CCD cameras  
60 [15]. In particular, Lee et al. have shown that action potential (AP) recordings up to 1,000 Hz  
61 and SNR of up to ~50 (defined as (AP Amplitude)/(SD during diastolic intervals)) are possible  
62 in large animal hearts with USB3.0 iDS (Imaging Development Systems, GmbH) cameras.  
63 Unfortunately, this method was not applied to rodents, which are much more popular models  
64 compared to pigs and rabbits, and not made available to the wider research community.

65 In our open-source research and development presented here we used iDS UI-3130CP-  
66 M-GL (~\$700US including lens) and iDS Software Suite programming interface that makes it  
67 possible to customize image acquisition (Fig 1). Here, we demonstrate capabilities of action  
68 potential recordings in the two most widespread laboratory animal models: rat and mouse  
69 hearts. Small rodent hearts are more challenging for optical recordings as compared to large  
70 animal hearts due to much lower optical signal intensity. We compared this inexpensive  
71 solution to the state-of-the-art MiCAM ULTIMA-L system, which has superior SNR (Fig 2),  
72 but at a much higher price of approximately \$100,000. New inexpensive optical mapping  
73 system provides sufficient quality data to track activation and repolarization sequences and  
74 action potential duration (APD).

75 **Fig 1. The experimental setup for the iDS camera.** (A) iDS UI-3130CP M.GL  
76 camera (977Hz sampling frequency). (B) Pentax C60607KP. (C) 650nm long-pass filter. (D)  
77 Green excitation LED (530nm wavelength). (E) Perfusion chamber with heart. (F) iDS  
78 Recorder application. (G) Open source RHYTHM1.2 software, based on Matlab and C++.

79 **Fig 2. Histogram of SNR in recordings from mouse ventricles (n=6).** Orange

80 represents SNR of the raw signal obtained by iDS, green represents SNR from the same pixels  
81 after signal conditioning, blue represents corresponding SNR of the raw signal obtained by  
82 MiCAM.

## 83 **Materials and Methods**

### 84 **iDS UI-3130CP camera and software**

85 In this study a UI-3130CP camera from Imaging Development Systems was used. It is  
86 capable of 10 bit recordings at resolutions up to 800 by 600 pixels. The “uEye cockpit” image  
87 acquisition software provided by iDS has neither an option to save recordings in lossless format,  
88 nor an option to make 10 bit recordings. Therefore we have developed a custom open-source  
89 image acquisition application using the C++ API provided by iDS  
90 (<https://github.com/humanphysiologylab/ueyemappingWin>).

91 The custom software was designed to make recordings with a resolution of 200x200  
92 pixels and a framerate of 977 frames per second (FPS). The high frequency recordings were  
93 possible because of the reduction of the active part of the sensor to the smaller area in the  
94 center. Although the framerate up to 1400 FPS is possible at 120x120 pixels resolution, this  
95 resulted in a narrow (5.5 degrees) field of view. Since direct capture to solid-state drive resulted  
96 in frame loss and uneven FPS, software was designed to capture the recording directly to the  
97 RAM and to transfer it to the storage after the recording has finished. This approach requires  
98 RAM size large enough to store the whole recording. For example, a 5 second recording at  
99 200x200 resolution at 977 FPS requires 375 MB of memory. Considering this data memory  
100 requirement, at least 2 GB of RAM is recommended. The software interface allows users to  
101 visualize signal intensity and change the recording gain and frame rate before the image  
102 acquisition (S1 Fig), which is essential to adjust LED intensity when signal intensity is too low  
103 or saturated. The file format of the data is covered in the software user manual. Binary iDS  
104 camera recordings are compatible with popular open-source RHYTHM signal processing and  
105 analysis software [9], which we update regularly.

## 106 **Optical mapping protocol**

107 All experimental protocols were approved by the Institutional Animal Care and Use  
108 Committee at The George Washington University and conform to the NIH Guide for the Care  
109 and Usage of Laboratory animals.

110 We followed the protocol described earlier [16]. Briefly, animals were anesthetized via  
111 isoflurane vapors, after ensuring thoracotomy heart was excised and cannulated. Hearts were  
112 Langendorff-perfused with Tyrode's solution (in mM: 128.2 NaCl, 4.7 KCl, 1.05 MgCl<sub>2</sub>, 1.3  
113 CaCl<sub>2</sub>, 1.19 NaH<sub>2</sub>PO<sub>4</sub>, 20 NaHCO<sub>3</sub>, 11.1 Glucose), electromechanically uncoupled with 5-10  
114  $\mu$ M blebbistatin and stained with voltage-sensitive dye Di-4-ANEPPS. Left ventricle was  
115 paced at 80 - 150 ms pacing cycle length (PCL), PCL of 150 ms was fast enough to suppress  
116 sinus rhythm in all experiments. The dye was excited with 520 nm LED (Prizmatix UHP-Mic-  
117 LED-520), and fluorescent emission was captured through a long-pass filter (650nm) (Fig 1).  
118 Resulting optical signal was recorded sequentially by either the iDS camera or the MiCAM  
119 from the same camera position: after recording several sequences at varying pacing cycle  
120 lengths (PCL), it was removed, and the iDS camera was installed in its place (Fig 1).

## 121 **Pharmacological protocol**

122 4-Aminopyridine (4-AP), a transient outward current ( $I_{to}$ ) blocker [17–24], was  
123 purchased from Millipore Sigma (Cat. 278575). 250 mM 4-AP stock solution. It was prepared  
124 with pH adjusted to 7.4 using 1 M hydrochloric acid (Fisher Scientific, SA48-1). Small  
125 quantities of the 4-AP stock solution were added to the modified Tyrode's perfusion solution  
126 and perfused for 10 min to reach a final working concentration of 5.6 mM.

## 127 **Data conditioning and analysis**

128 Signal conditioning included ensemble averaging both in space (gaussian filter with  
129 window of 3 by 3 pixels for MiCAM and 5 by 5 pixels for iDS) and in time (all beats were  
130 averaged in a 2 s recording). Conduction velocity was calculated using RHYTHM 1.2 [9]. with  
131 the algorithm earlier described by Bayly et al [25]. Signal-to-noise ratio (SNR) was calculated  
132 as the ratio of the root mean square amplitude to the root mean square noise, where the

133 amplitude of noise is evaluated at resting potential.

134 APD was measured at 80 % repolarization (APD80). The noise amplitude affected  
135 apparent resting potential in the recordings, hampering the comparison of APD80 measured by  
136 two cameras. Therefore, prior to APD calculation, resting potential level for each pixel was  
137 determined by gaussian filter ( $\sigma = 7\text{ms}$ , truncated at  $4*\sigma$ ). Prior to APD calculations, noisy and  
138 oversaturated areas were excluded semi-automatically by choosing appropriate SNR and signal  
139 intensity cutoff levels.

140 Signal processing and analysis were done with Rhythm 1.2 software [9], while APD  
141 and SNR comparison between two cameras were done as described above with custom python  
142 scripts.

## 143 Results

144 The capabilities and limitations of the iDS camera system were tested in comparison  
145 with the more expensive state-of-the-art MiCAM Ultimate-L system on Langendorff-perfused  
146 mouse and rat hearts. We used the traditional optical mapping setup [16] shown on Fig 1 (see  
147 “Materials and Methods” for details on signal acquisition and processing). Raw iDS signal  
148 recordings were, in general, quite noisy: SNR was  $0.5 \pm 0.4$  for mouse hearts (Fig 2, S2 Fig;  
149 here and below standard errors are reported). Signal processing (binning and ensemble  
150 averaging, see Methods for details) increased SNR to  $16 \pm 10$  for the mouse heart. The  
151 comparison of representative iDS and MiCAM optical mapping systems recordings are shown  
152 in Fig 3C-H, Fig 4C-H. The processed signal clearly reproduces both depolarization phase and  
153 general AP waveform.

154 **Fig 3. Conditioned signals in recordings of a mouse heart.** (A),(B) Still frames with  
155 color-coded pixels corresponding to the AP waveforms. (C),(E),(G) Signals obtained from iDS  
156 camera. (D),(F),(H) Signals obtained from the MiCAM camera.

157 **Fig 4. Conditioned signals in optical recordings of a rat heart.** (A),(B) Still frames  
158 with color-coded pixels corresponding to the AP waveforms. (C),(E),(G) Signals obtained from  
159 iDS camera. (D),(F),(H) Signals obtained from the MiCAM camera.

160 In order to verify the accuracy of the conditioned signal waveform we have compared  
161 the mouse APD measured by the two cameras in control (n=6) and during administration of Ito  
162 blocker 4-aminopyridine (5.6mM, n=6). The comparison at 150 ms PCL is summarized in Fig  
163 5. APD80 measurements by two cameras differed by  $9 \pm 9$  ms in control and  $4 \pm 4$  ms in 4-AP.  
164 The difference is partially due to the fact that recordings were not simultaneous and the field  
165 of view was slightly different. However, we found no statistically significant differences  
166 between APD measured by the cameras (paired t-test:  $p = 0.101$  in control,  $p = 0.058$  with 4AP;  
167 unpaired t-test:  $p = 0.264$  in control,  $p = 0.681$  with 4AP). It was possible to measure drug  
168 effect by the cheaper system: the iDS camera system registered  $18 \pm 3$  ms action potential  
169 prolongation by 4-AP ( $p = 0.0003$ , paired t-test, Fig 5) which corresponds to low concentration  
170 4-AP measurements in isolated cell experiments [17].

171 **Fig 5. Comparison of APD measured by iDS and MiCAM.** Comparison was made  
172 for a range of hearts (n=6) at PCL = 150ms in control and in presence of 5.6mM 4AP.  
173 Statistically significant differences are marked by an asterisk (paired t-test).

174 The APD restitution is depicted in Fig 6A. We did observe the reduction of APD with  
175 decreasing PCL with both cameras: over a change of PCL from 150 ms to 80 ms mean APD  
176 has decreased by 20 ms according to iDS and by 22 ms according to MiCAM, corresponding  
177 to relatively shallow slope of the restitution of the mouse heart [26,27].

178 **Fig 6. APD and CV restitution curves.** (A) APD80 restitution in control and in  
179 presence of 5.6 mM 4AP and (B) longitudinal/transversal CV restitution measured by iDS and  
180 MiCAM cameras.

181 Fig 7 and Fig 8 show comparisons of activation maps (A, C) and APD maps (B, D)  
182 measured in mouse and rat heart by iDS and MiCAM. Since the depolarization phase is less  
183 prone to noise, activation sequence and, consequently, CV could be determined more  
184 accurately than APD with the iDS camera. Root mean square deviation (RMSD) between  
185 measurements by two cameras was  $4$  cm/s for longitudinal CV and  $2$  cm/s for transversal CV  
186 (Fig 6B). The CV restitution measurements with iDS camera were consistent with previous  
187 studies [28,29] with a slight reduction in CV when pacing frequency was increased (or PCL  
188 reduced). For example, at PCL=150 ms longitudinal CV was  $51 \pm 4$  cm/s, transversal CV was

189  $29 \pm 3$  cm/s; while at PCL=90 ms longitudinal CV was  $47 \pm 3$  cm/s, transversal CV was  $25 \pm$   
190  $3$  cm/s, which is close to previously published measurements [28,29].

191 **Fig 7. Comparison of activation maps and APD maps recorded by iDS and**  
192 **MiCAM.** (A) Mouse heart activation sequence measured by iDS camera. (B) Mouse heart  
193 APD map measured by iDS camera. (C) Activation sequence measured by MiCAM camera.  
194 (D) APD map measured by MiCAM camera. Pacing electrode location is marked by the  
195 lightning symbol, black and orange arrows mark the directions for longitudinal and transversal  
196 conduction velocities, correspondingly.

197 **Fig 8. Comparison of activation maps and APD maps captured by iDS and**  
198 **MiCAM.** (A) Rat heart activation sequence measured by iDS camera. (B) Rat heart APD map  
199 measured by iDS camera. (C) Activation sequence measured by MiCAM camera. (D) APD  
200 map measured by MiCAM camera. Pacing electrode location is marked by the lightning  
201 symbol.

202 It should also be noted that the rat heart (Fig 8) was paced from the atrioventricular  
203 groove. We can see independent AP propagation in the atria and ventricles from the pacing  
204 electrode, which demonstrates that both atrial and ventricular activation sequence can be  
205 accurately recorded with a cheaper optical mapping system.

## 206 **Discussion**

207 We have implemented a low-cost open-source optical mapping system, capable of 977  
208 FPS 200x200 pixel imaging. The total system price, as shown in S1 Table, is below US\$5,000  
209 including the light source, at the time of publication, while the gold standard Micam Ultima-L  
210 system used in this study for comparison is priced at or above US\$100,000. It should be noted  
211 that the main goal of the study was to test the iDS camera capabilities and limitations. Therefore,  
212 we kept all components apart from camera and optics equal in both optical mapping system  
213 setups. As a consequence, the LED we used for die excitation was the most expensive part of  
214 the optical mapping system, while the camera and lens themselves were priced below  
215 US\$1,000.



216 In our study we have shown that iDS system recordings are of sufficient quality for AP  
217 waveform (Figs 3,4), activation sequence (Figs 7A, 8A) and CV (Fig 6B) measurements, at  
218 1/100 price. Low signal amplitude resulted in SNR of raw recordings of  $0.5 \pm 0.4$  for the mouse  
219 heart and  $2.0 \pm 0.7$  for the rat heart. After signal conditioning, including binning and ensemble  
220 averaging, SNR significantly improved to  $16 \pm 10$  for mouse heart and  $10 \pm 3$  for a rat heart  
221 making it close to MiCAM recordings (Fig 2). As noted above, depolarization phase recording  
222 is less prone to noise than relatively slow repolarization. Consequently, activation sequence  
223 and CV measurements by iDS system were robust: RMSD between corresponding recordings  
224 by two cameras was equal to 4 cm/s. On the other hand the difference between APD  
225 measurements was more pronounced. For example, iDS measurements at 150 ms PCL w/o  
226 drug were on average 9 ms longer than MiCAM measurements (Fig 6A). This difference is, in  
227 part, due to the distortion of the depolarisation phase and resting potential level by noise. The  
228 latter affects the 80% repolarization level hampering the comparison between cameras with  
229 different SNR. However, in the worst-case scenario, the difference between APD  
230 measurements was 22 ms despite the fact that SNR was high in the iDS recording (SNR equals  
231 25 for this heart, while the average SNR was 16, representative SNR maps for all recordings  
232 can be found in S2 Fig). We conclude that largest deviations between the recordings are  
233 actually caused by the fact that recordings were not simultaneous, and the field of view was  
234 different for the two cameras. Despite this difference between the recordings, we have  
235 demonstrated that the iDS system is feasible for drug effect measurements. In particular, we  
236 have shown significant prolongation of APD by the transient outward current blocker 4-AP  
237 (Fig. 5,  $18 \pm 3$  ms,  $n=5$ ,  $p=0.0003$ , paired t-test). Similar APD prolongation at low drug  
238 concentrations was reported previously in isolated mouse ventricular cells[17] and small tissue  
239 atrial preparations[30].

240 Previously Lee et al. had already demonstrated iDS low-cost cameras for panoramic  
241 optical mapping [14], using UI-3360CP camera at 1,000 FPS, 160x220 pixels, yielding SNR  
242 of about 35 for pig hearts and SNR of about 10 for rabbit hearts at 400 FPS, but the software  
243 used in the study was not openly available and the method was not widely disseminated in  
244 cardiovascular research community. During the preparation of this publication, Lee et al.  
245 published a report of a complete and low-cost optical mapping system, which includes a  
246 Langendorff perfusion system complete with pumps and a thermostat with custom controllers,

247 as well as an LED system and an open-source code for low-cost iDS camera [31]. However,  
248 this competing software is not readily compatible with currently available GUI-based signal  
249 conditioning and analysis software [9,32–34] and it lacks a graphical user interface suggesting  
250 the use of separate *uEye cockpit* application to refocus the camera, adjust the LED intensity  
251 and camera gain. The authors presented recordings at 500 FPS, which is often not enough for  
252 rodent hearts, in which the entire heart activation takes about 10 ms (Figs 7, 8). The validation  
253 of the system in the study was conducted on large mammals, pig and rabbit hearts, while  
254 lacking direct comparison to established optical mapping systems. It remains to be shown that  
255 their method is applicable to popular rodent heart models.

256 In our work, we focused on the development of optical mapping solution that can be  
257 used by biomedical researchers and educators lacking programming or electrical engineering  
258 skills. We present a custom open-source software that provides a graphical user interface,  
259 convenient interactive camera settings and a real-time viewfinder feed (S1 Fig) and is  
260 compatible with established open source Rhythm analysis software that was used through the  
261 past decade by many research laboratories [9,32]. The solution including camera and custom  
262 open-source software was proven to produce accurate recordings by direct comparison to a  
263 specialized optical mapping system. Moreover, our study demonstrates that AP measurements  
264 on mouse and rat ventricles (thickness 1.5 and 1.9 mm) and atria are possible, while the  
265 previous studies focused on much larger mammals: pig (thickness 20 mm) and rabbit ventricles  
266 (thickness 5 mm) [35-38]. While larger hearts yield higher signal intensity, we have  
267 demonstrated that at 977 FPS, 200x200 pixels the iDS solution is sufficient not only for AP  
268 waveform recordings in small rodent hearts, but also for accurate measurements of both  
269 longitudinal and transversal CV in the mouse heart. The high flexibility of software also allows  
270 for long recordings. We have tested up to five minutes recordings. It may prove to be essential  
271 for the measurement of slower NADH changes during ischemia/reperfusion studies[7,39].  
272 Signal acquisition and processing software used in this study are open-source and distributed  
273 under MIT license (the links are provided in the Appendix).

274 One of the limitations of the presented solution is a requirement of a wide-angle lens.  
275 UI-3130CP has a 1/3.6” sensor, while the effective size was reduced to 1x1mm in order to  
276 increase the camera frame rate. Therefore, the lens used in the study (Pentax 6mm TV lens)

277 provided only a 9.2 degrees field of view, which is optimal for the hearts of small rodents such  
278 as rats and mice, but a different lens or a tandem optical system should be designed for larger  
279 mammals.

## 280 **References**

- 281 1. Boukens BJ, Efimov IR. A century of optocardiography. *IEEE Rev Biomed Eng.*  
282 2014;7: 115–125.
- 283 2. Cohen LB, Salzberg BM. Optical measurement of membrane potential. *Reviews of*  
284 *Physiology, Biochemistry and Pharmacology.* 1978. pp. 35–88. doi:10.1007/3-540-  
285 08907-1\_2
- 286 3. Salzberg BM, Davila HV, Cohen LB. Optical recording of impulses in individual  
287 neurones of an invertebrate central nervous system. *Nature.* 1973;246: 508–509.
- 288 4. Salama G, Morad M. Merocyanine 540 as an optical probe of transmembrane electrical  
289 activity in the heart. *Science.* 1976;191: 485–487.
- 290 5. Loew LM. Design and characterization of electrochromic membrane probes. *J Biochem*  
291 *Biophys Methods.* 1982;6: 243–260.
- 292 6. Takahashi A, Camacho P, Lechleiter JD, Herman B. Measurement of intracellular  
293 calcium. *Physiol Rev.* 1999;79: 1089–1125.
- 294 7. Salama G, Lombardi R, Elson J. Maps of optical action potentials and NADH  
295 fluorescence in intact working hearts. *Am J Physiol.* 1987;252: H384–94.
- 296 8. Efimov IR, Huang DT, Rendt JM, Salama G. Optical mapping of repolarization and  
297 refractoriness from intact hearts. *Circulation.* 1994. pp. 1469–1480.  
298 doi:10.1161/01.cir.90.3.1469
- 299 9. Cathey B, Obaid S, Zolotarev AM, Pryamonosov RA, Syunyaev RA, George SA, et al.  
300 Open-Source Multiparametric Optocardiography. *Sci Rep.* 2019;9: 721.
- 301 10. Lin SF, Wikswo JP. Panoramic optical imaging of electrical propagation in isolated  
302 heart. *J Biomed Opt.* 1999;4: 200–207.
- 303 11. Gloschat C, Aras K, Gupta S, Faye NR, Zhang H, Syunyaev RA, et al. RHYTHM: An  
304 Open Source Imaging Toolkit for Cardiac Panoramic Optical Mapping. *Sci Rep.* 2018;8:  
305 2921.
- 306 12. Bernus O, Mukund KS, Pertsov AM. Detection of intramyocardial scroll waves using  
307 absorptive transillumination imaging. *J Biomed Opt.* 2007;12: 014035.

- 308 13. Ripplinger CM. Panoramic Optical Imaging of Cardiac Arrhythmias. *Cardiac Mapping*.  
309 2012. pp. 90–97. doi:10.1002/9781118481585.ch10
- 310 14. Lee P, Calvo CJ, Alfonso-Almazán JM, Quintanilla JG, Chorro FJ, Yan P, et al. Low-  
311 Cost Optical Mapping Systems for Panoramic Imaging of Complex Arrhythmias and  
312 Drug-Action in Translational Heart Models. *Sci Rep*. 2017;7: 43217.
- 313 15. Witkowski FX, Leon LJ, Penkoske PA, Giles WR, Spano ML, Ditto WL, et al.  
314 Spatiotemporal evolution of ventricular fibrillation. *Nature*. 1998;392: 78–82.
- 315 16. Lang D, Sulkin M, Lou Q, Efimov IR. Optical mapping of action potentials and calcium  
316 transients in the mouse heart. *J Vis Exp*. 2011. doi:10.3791/3275
- 317 17. Fiset C, Clark RB, Larsen TS, Giles WR. A rapidly activating sustained K<sup>+</sup> current  
318 modulates repolarization and excitation-contraction coupling in adult mouse ventricle. *J*  
319 *Physiol*. 1997;504 ( Pt 3): 557–563.
- 320 18. Li GR, Feng J, Wang Z, Fermini B, Nattel S. Comparative mechanisms of 4-  
321 aminopyridine-resistant Ito in human and rabbit atrial myocytes. *Am J Physiol*.  
322 1995;269: H463–72.
- 323 19. Näbauer M, Beuckelmann DJ, Erdmann E. Characteristics of transient outward current  
324 in human ventricular myocytes from patients with terminal heart failure. *Circ Res*.  
325 1993;73: 386–394.
- 326 20. Wegener JW, Peiter A, Sampson SR, Nawrath H. Mechanism of block by 4-  
327 aminopyridine of the transient outward current in rat ventricular cardiomyocytes. *J*  
328 *Cardiovasc Pharmacol*. 1998;32: 134–138.
- 329 21. Castle NA, Slawsky MT. Characterization of 4-aminopyridine block of the transient  
330 outward K<sup>+</sup> current in adult rat ventricular myocytes. *J Pharmacol Exp Ther*. 1993;265:  
331 1450–1459.
- 332 22. Simurda J, Simurdová M, Christé G. Use-dependent effects of 4-aminopyridine on  
333 transient outward current in dog ventricular muscle. *Pflugers Arch*. 1989;415: 244–246.
- 334 23. Kostadinova I, Danchev N. 4-aminopyridine – the new old drug for the treatment of  
335 neurodegenerative diseases. *Pharmacia*. 2019. pp. 67–74.  
336 doi:10.3897/pharmacia.66.e35976
- 337 24. Huang CL-H. Murine Electrophysiological Models of Cardiac Arrhythmogenesis.  
338 *Physiol Rev*. 2017;97: 283–409.
- 339 25. Bayly PV, KenKnight BH, Rogers JM, Hillsley RE, Ideker RE, Smith WM. Estimation  
340 of conduction velocity vector fields from epicardial mapping data. *IEEE Trans Biomed*  
341 *Eng*. 1998;45: 563–571.
- 342 26. Knollmann BC, Schober T, Petersen AO, Sirenko SG, Franz MR. Action potential

- 343 characterization in intact mouse heart: steady-state cycle length dependence and  
344 electrical restitution. *Am J Physiol Heart Circ Physiol*. 2007;292: H614–21.
- 345 27. Knollmann BC, Katchman AN, Franz MR. Monophasic action potential recordings from  
346 intact mouse heart: validation, regional heterogeneity, and relation to refractoriness. *J*  
347 *Cardiovasc Electrophysiol*. 2001;12: 1286–1294.
- 348 28. Stein M, van Veen TAB, Hauer RNW, de Bakker JMT, van Rijen HVM. A 50%  
349 Reduction of Excitability but Not of Intercellular Coupling Affects Conduction Velocity  
350 Restitution and Activation Delay in the Mouse Heart. *PLoS ONE*. 2011. p. e20310.  
351 doi:10.1371/journal.pone.0020310
- 352 29. Eloff BC, Lerner DL, Yamada KA, Schuessler RB, Saffitz JE, Rosenbaum DS. High  
353 resolution optical mapping reveals conduction slowing in connexin43 deficient mice.  
354 *Cardiovasc Res*. 2001;51: 681–690.
- 355 30. Golovko V, Gonotkov M, Lebedeva E. Effects of 4-aminopyridine on action potentials  
356 generation in mouse sinoauricular node strips. *Physiological Reports*. 2015. p. e12447.  
357 doi:10.14814/phy2.12447
- 358 31. Marina-Breyse M, García-Escolano A, Vila-García J, Reale-Nosei G, Alfonso-Almazán  
359 JM, Yan P, et al. A Complete and Low-Cost Cardiac Optical Mapping System in  
360 Translational Animal Models. *Front Physiol*. 2021;12: 696270.
- 361 32. Laughner JJ, Ng FS, Sulkin MS, Arthur RM, Efimov IR. Processing and analysis of  
362 cardiac optical mapping data obtained with potentiometric dyes. *Am J Physiol Heart*  
363 *Circ Physiol*. 2012;303: H753–65.
- 364 33. O’Shea C, Holmes AP, Yu TY, Winter J, Wells SP, Correia J, et al. ElectroMap: High-  
365 throughput open-source software for analysis and mapping of cardiac electrophysiology.  
366 *Sci Rep*. 2019;9: 1389.
- 367 34. Li X, Roney CH, Handa BS, Chowdhury RA, Niederer SA, Peters NS, et al.  
368 Standardised Framework for Quantitative Analysis of Fibrillation Dynamics. *Sci Rep*.  
369 2019;9: 16671.
- 370 35. Forman DE, Cittadini A, Azhar G, Douglas PS, Wei JY. Cardiac morphology and  
371 function in senescent rats: gender-related differences. *J Am Coll Cardiol*. 1997;30:  
372 1872–1877.
- 373 36. Vetter FJ, McCulloch AD. Three-dimensional analysis of regional cardiac function: a  
374 model of rabbit ventricular anatomy. *Progress in Biophysics and Molecular Biology*.  
375 1998. pp. 157–183. doi:10.1016/s0079-6107(98)00006-6
- 376 37. Huang SY, Tsou HL, Chiu YT, Wu JJ, Lin JH, Yang PC, et al. Statistical method for  
377 characterization of hypertrophic cardiomyopathy by use of morphologic and pathologic  
378 measurements in pigs (*Sus scrofa domestica*). *Lab Anim Sci*. 1999;49: 276–282.

379 38. Doevendans P. Cardiovascular phenotyping in mice. *Cardiovascular Research*. 1998. pp.  
380 34–49. doi:10.1016/s0008-6363(98)00073-x

381 39. Mercader M, Swift L, Sood S, Asfour H, Kay M, Sarvazyan N. Use of endogenous  
382 NADH fluorescence for real-time in situ visualization of epicardial radiofrequency  
383 ablation lesions and gaps. *Am J Physiol Heart Circ Physiol*. 2012;302: H2131–8.

384

## 385 **Supporting information**

386 **S1 Fig. Interactive image acquisition software.** Screenshots of image acquisition  
387 software. Real-time viewfinder feed allows the user to adjust settings when signal amplitude  
388 is too low (B,C) or oversaturating (D).

389 **S2 Fig. SNR maps.** SNR maps for conditioned recordings of 6 mouse hearts recorded  
390 with iDS camera at PCL = 150 ms.

391 **S1 Table. Component prices in the MiCAM Ultimate-L system and the system**  
392 **presented in this study.**

393 **S1 Text. Software links and supporting figures.**

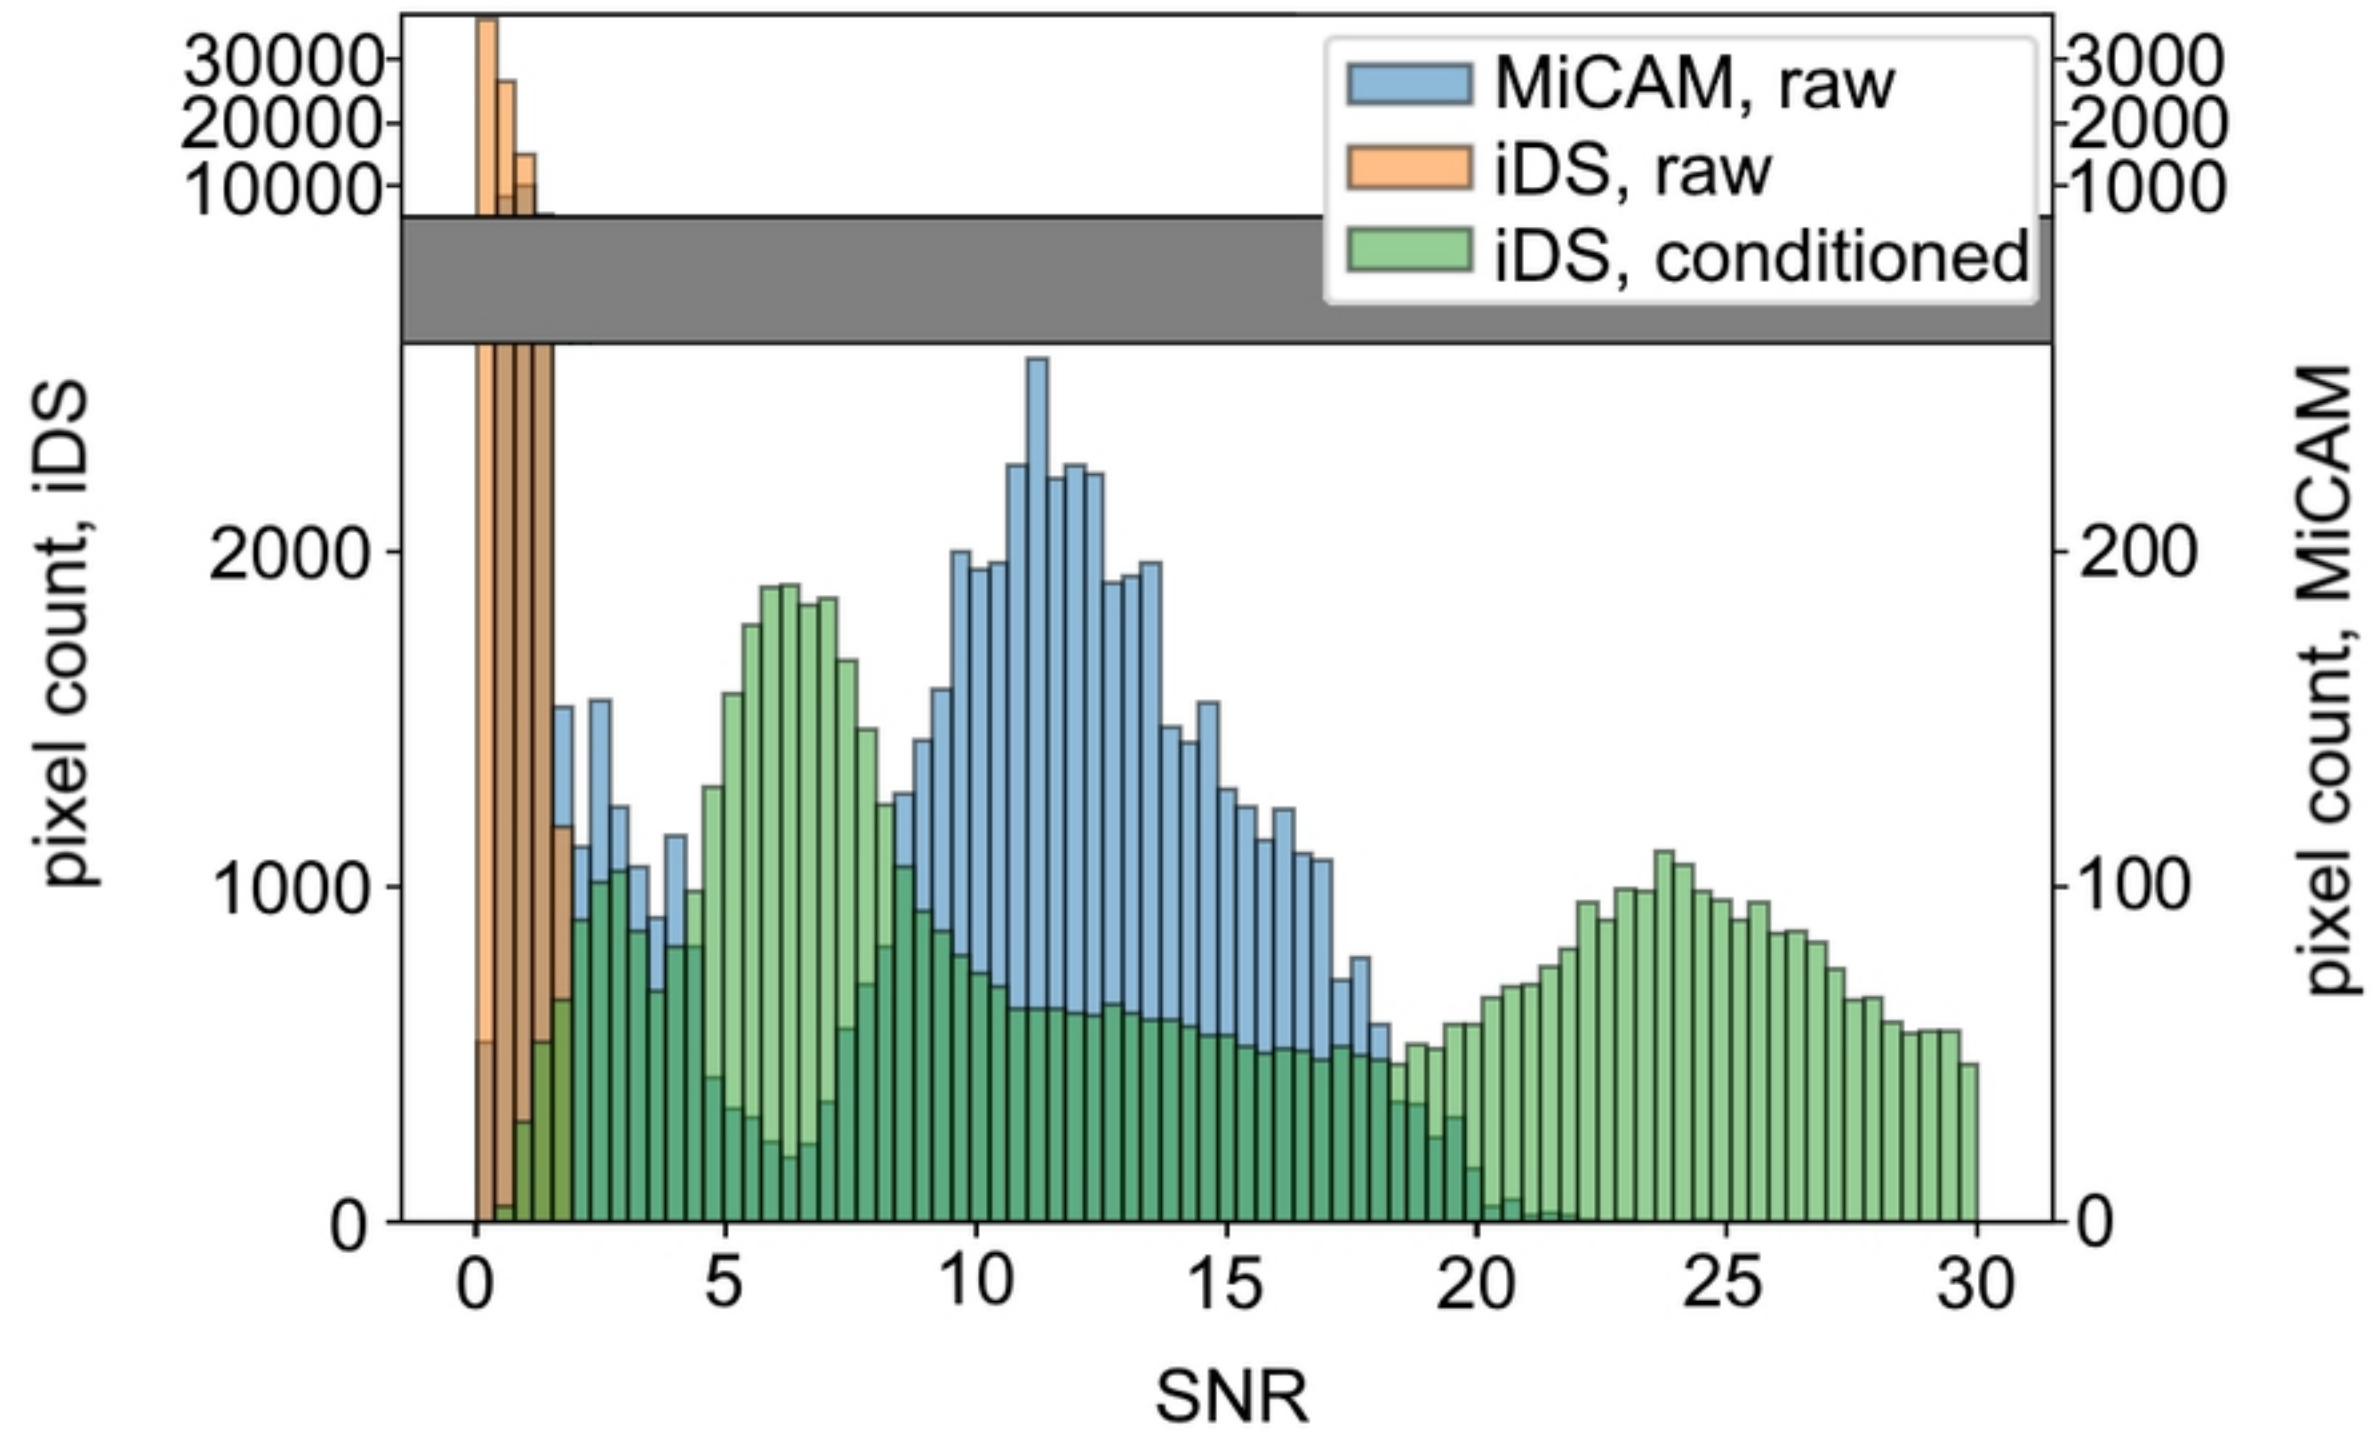

Figure 2

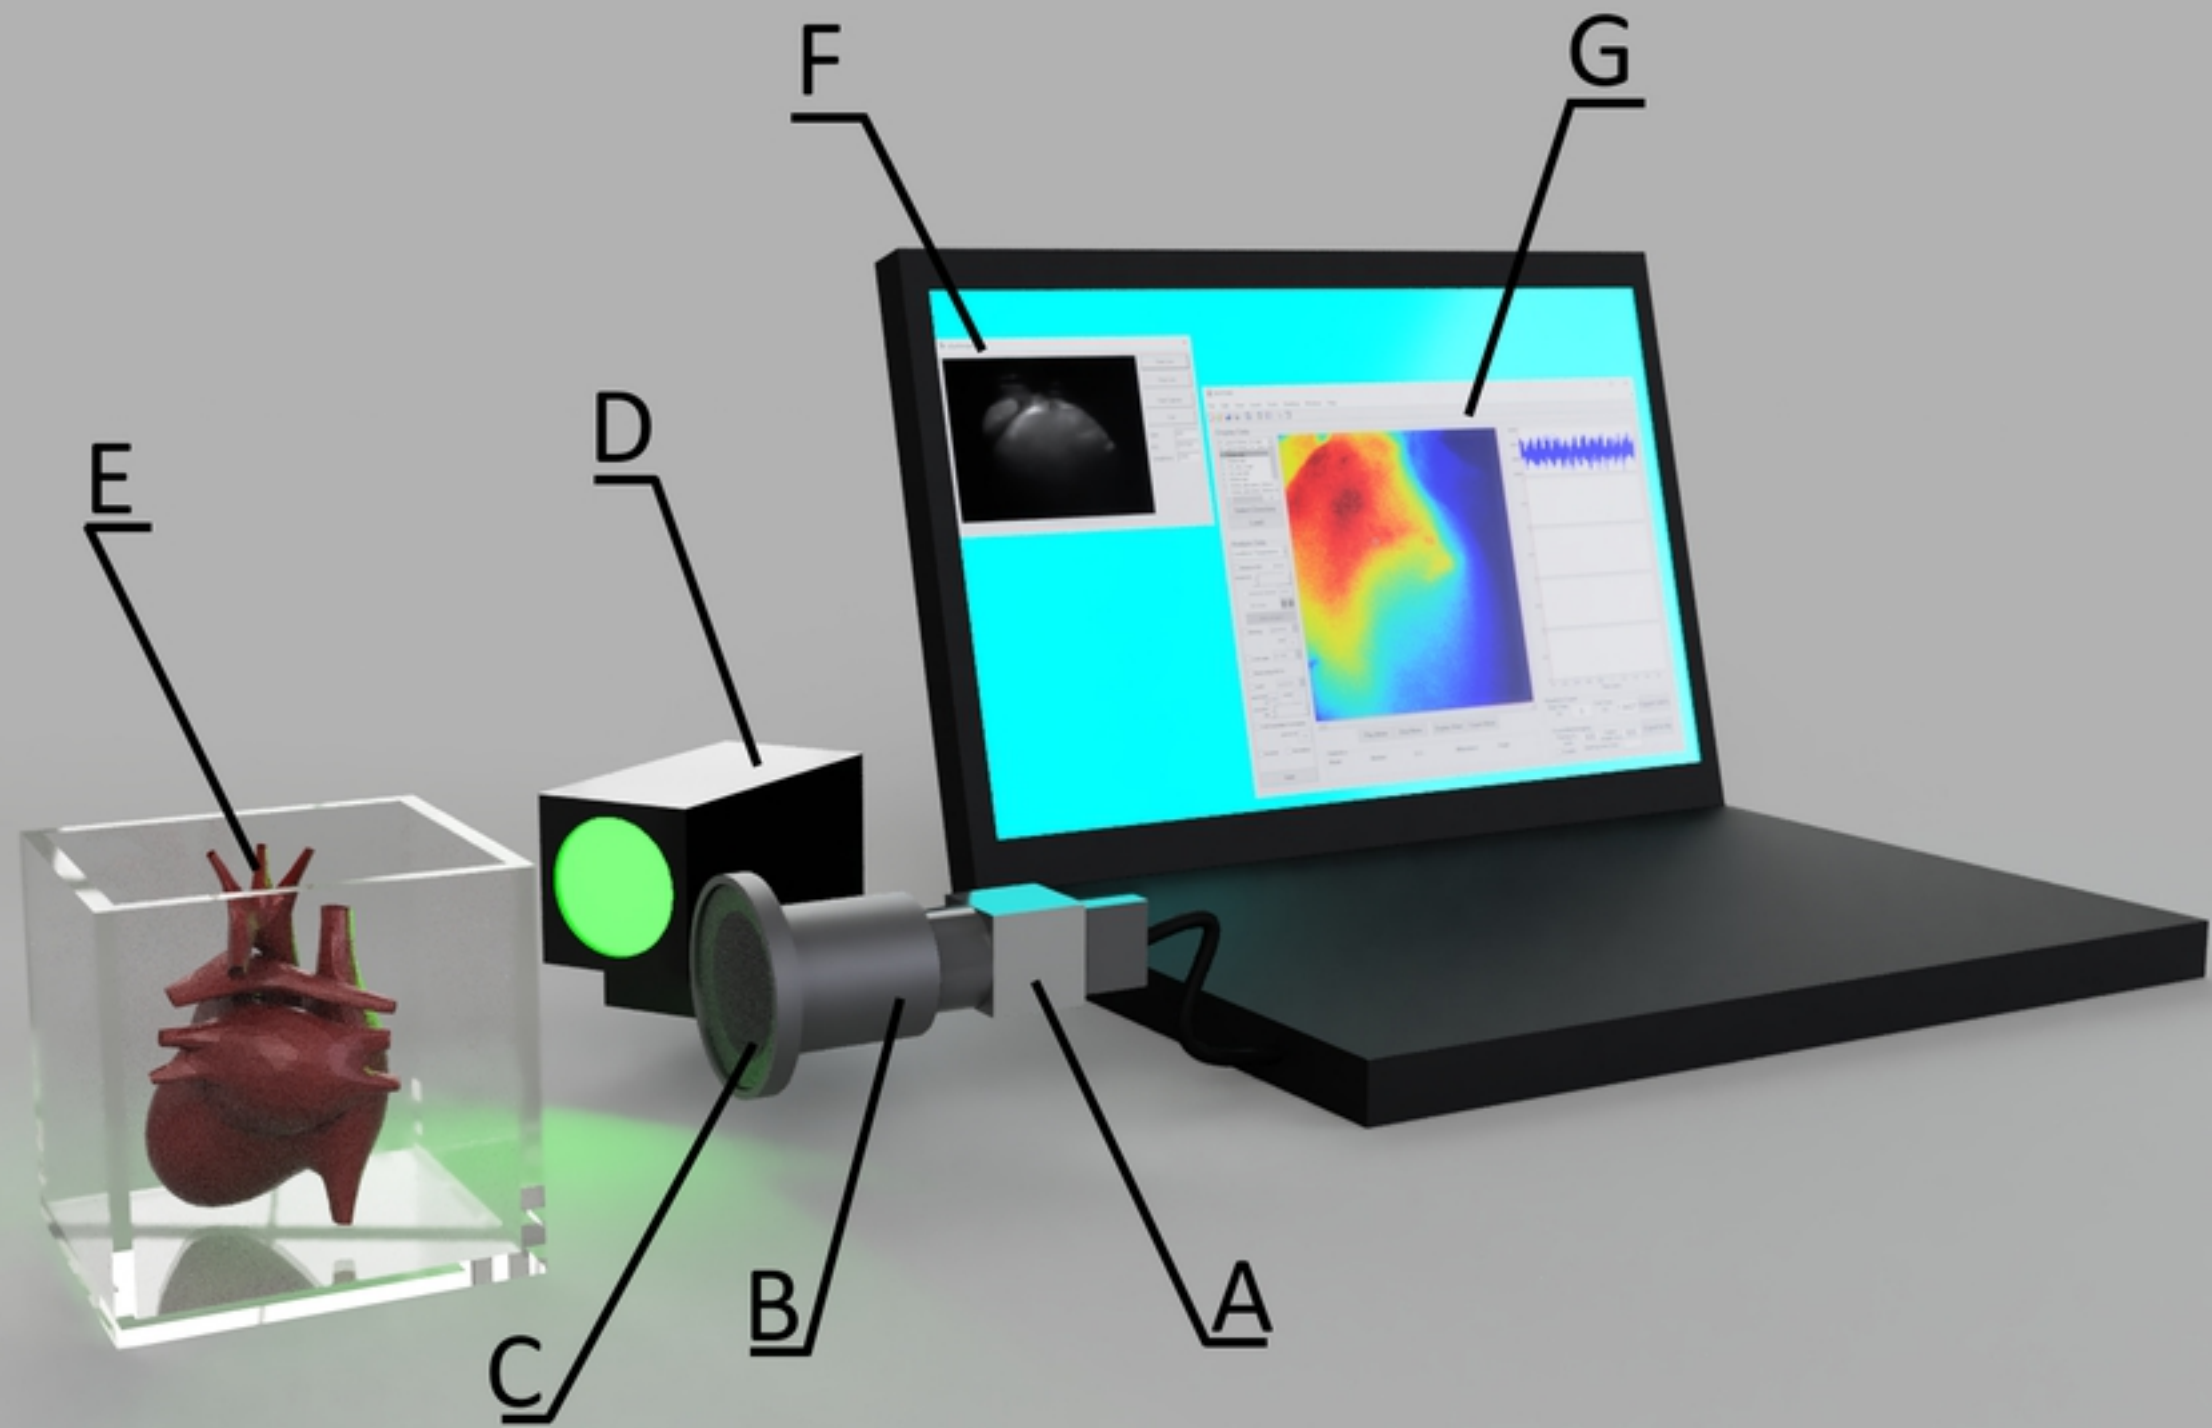

Figure 1



iDS

**A**

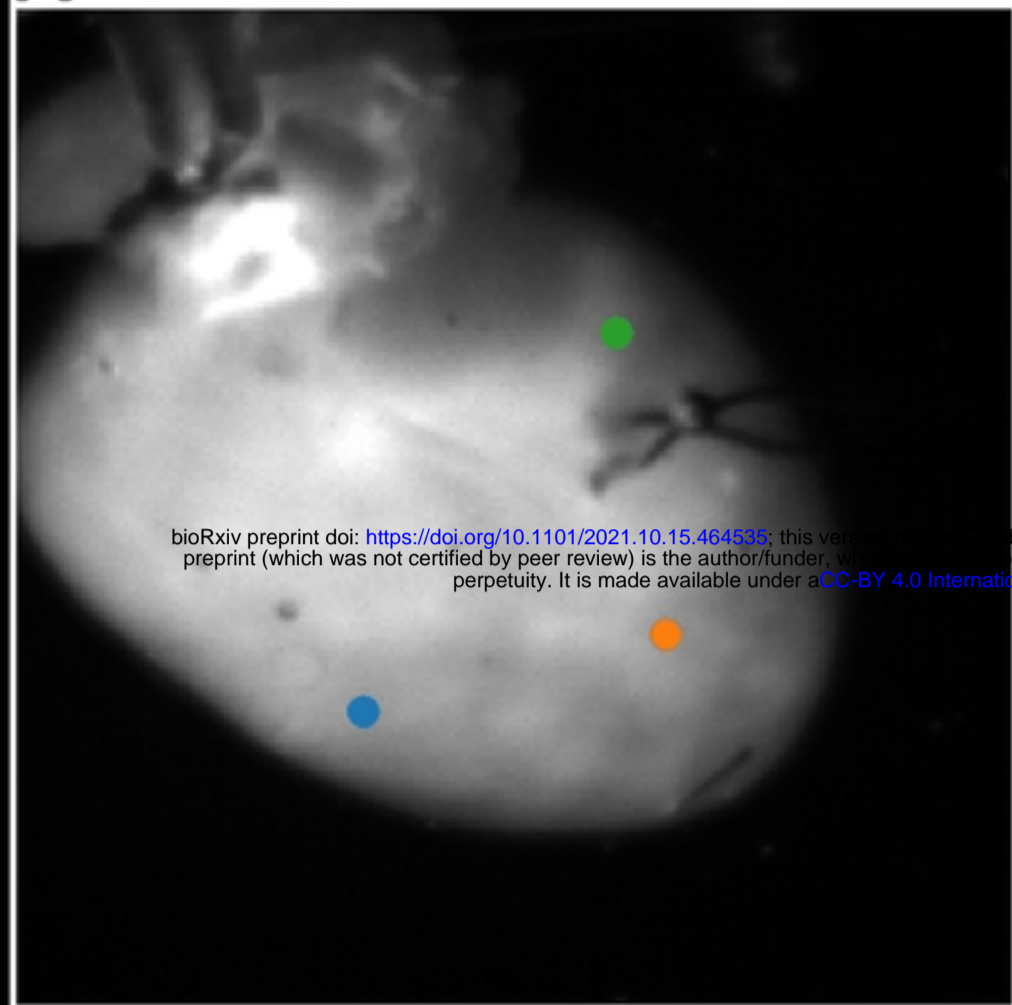

2 mm

**C**

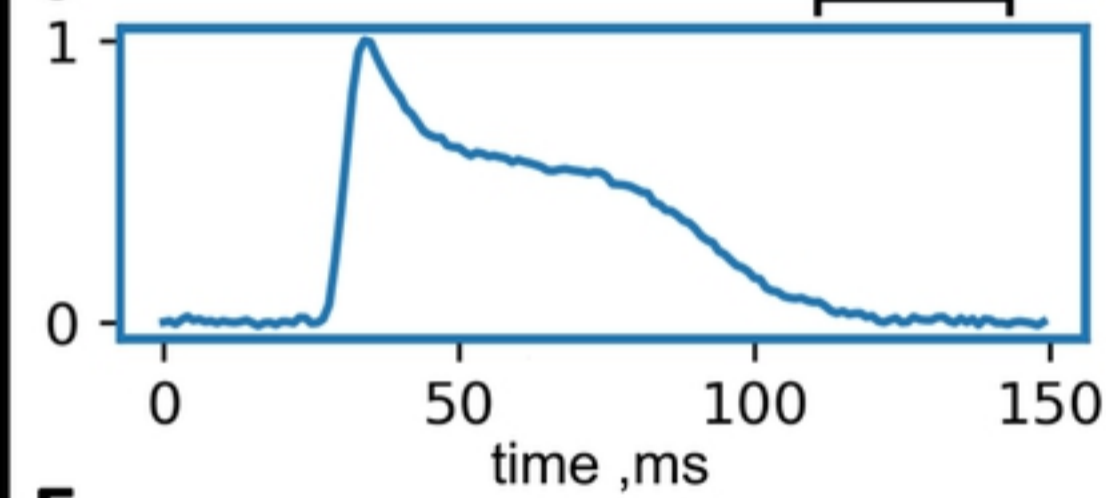

**E**

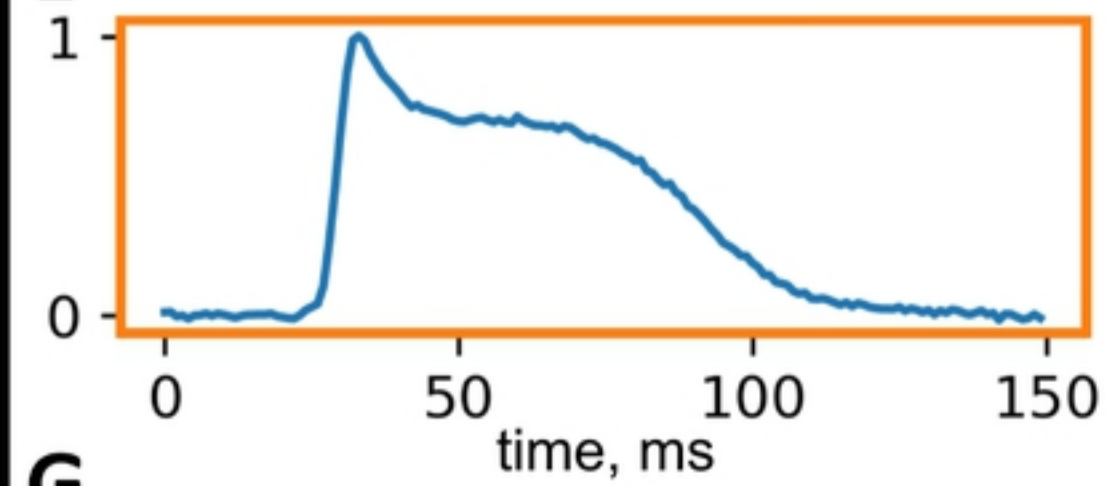

**G**

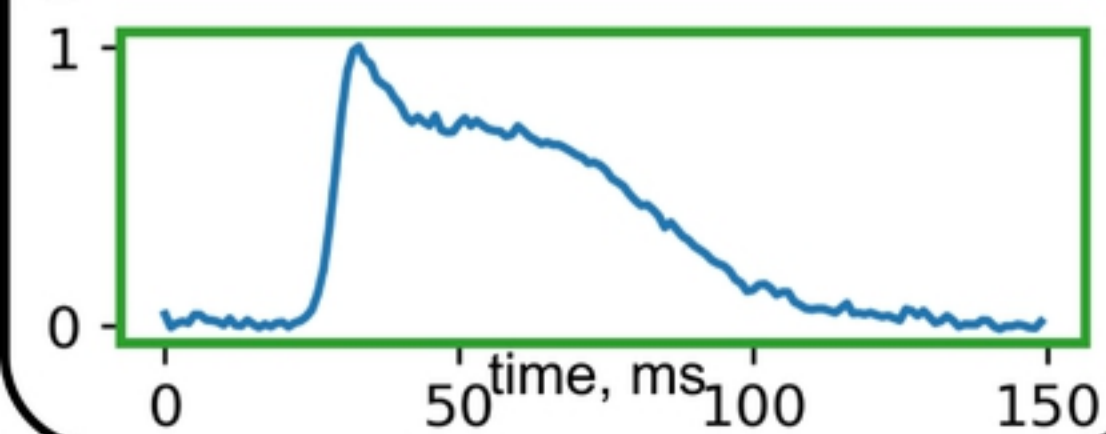

MiCAM

**B**

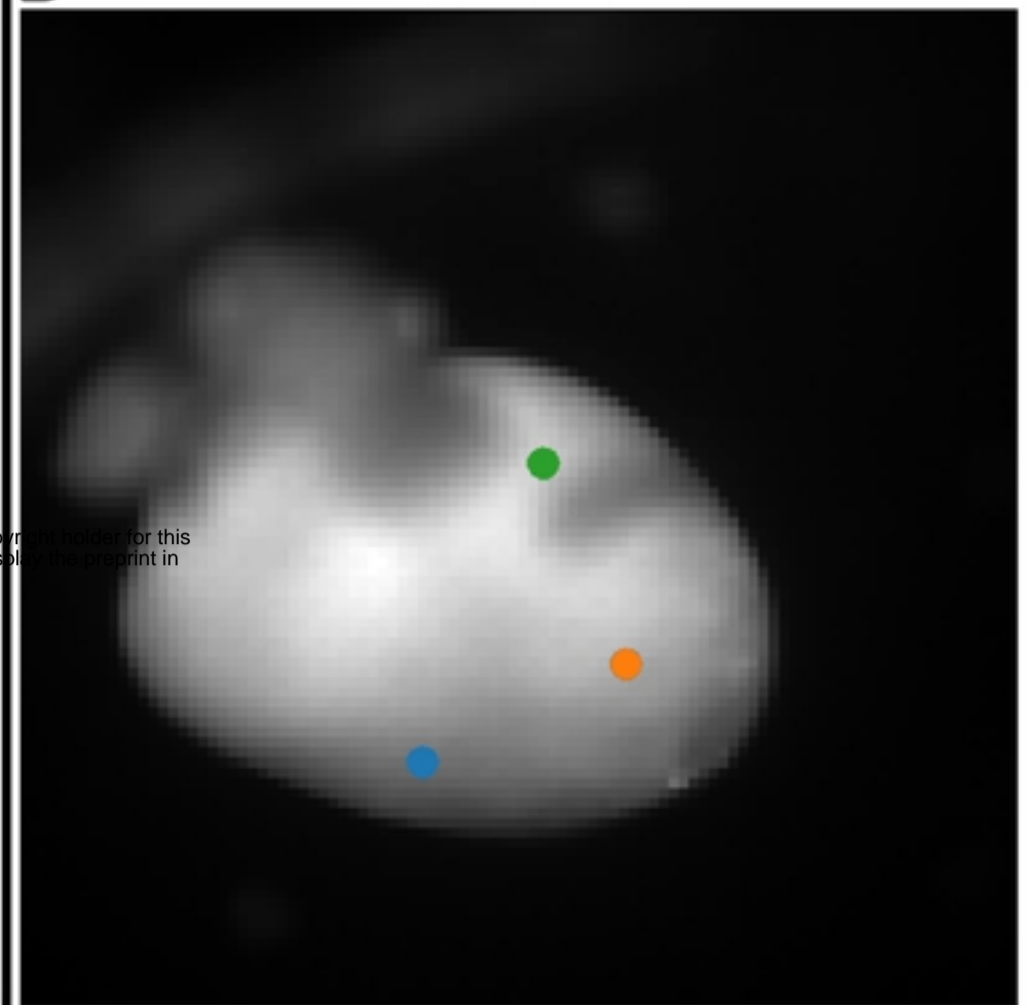

2 mm

**D**

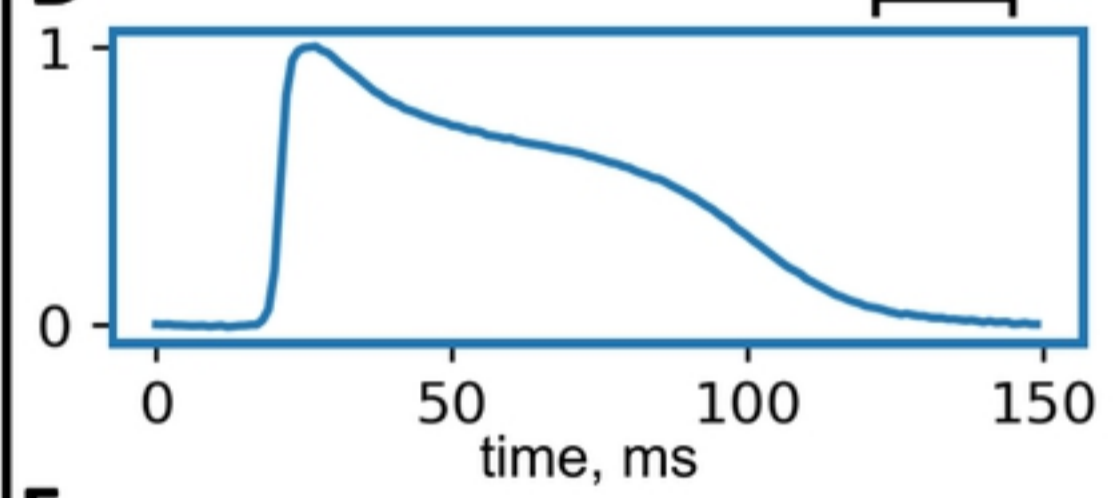

**F**

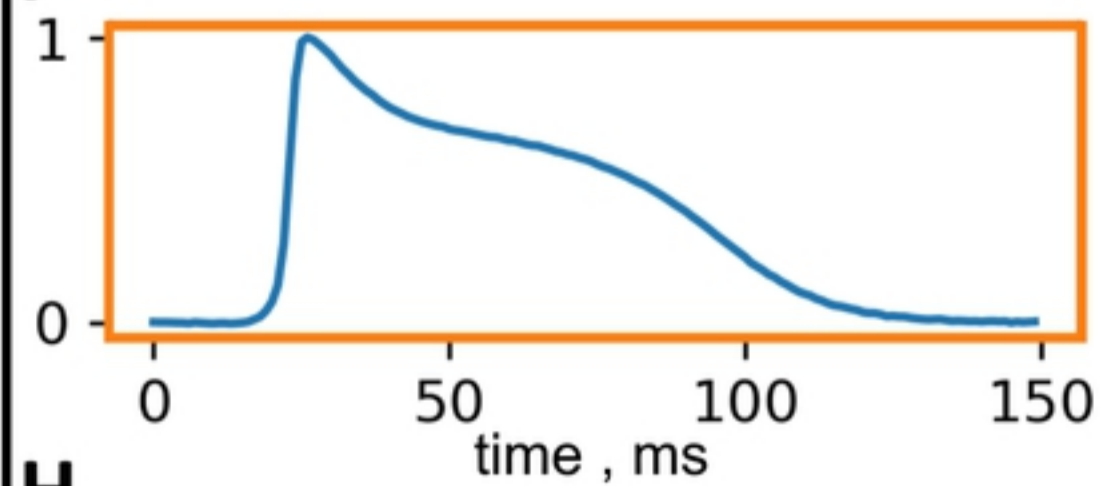

**H**

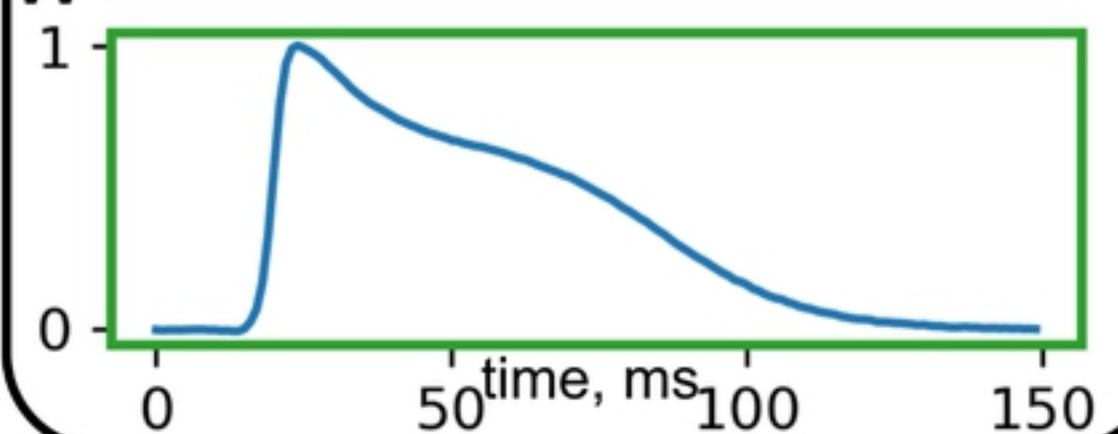

Figure 3

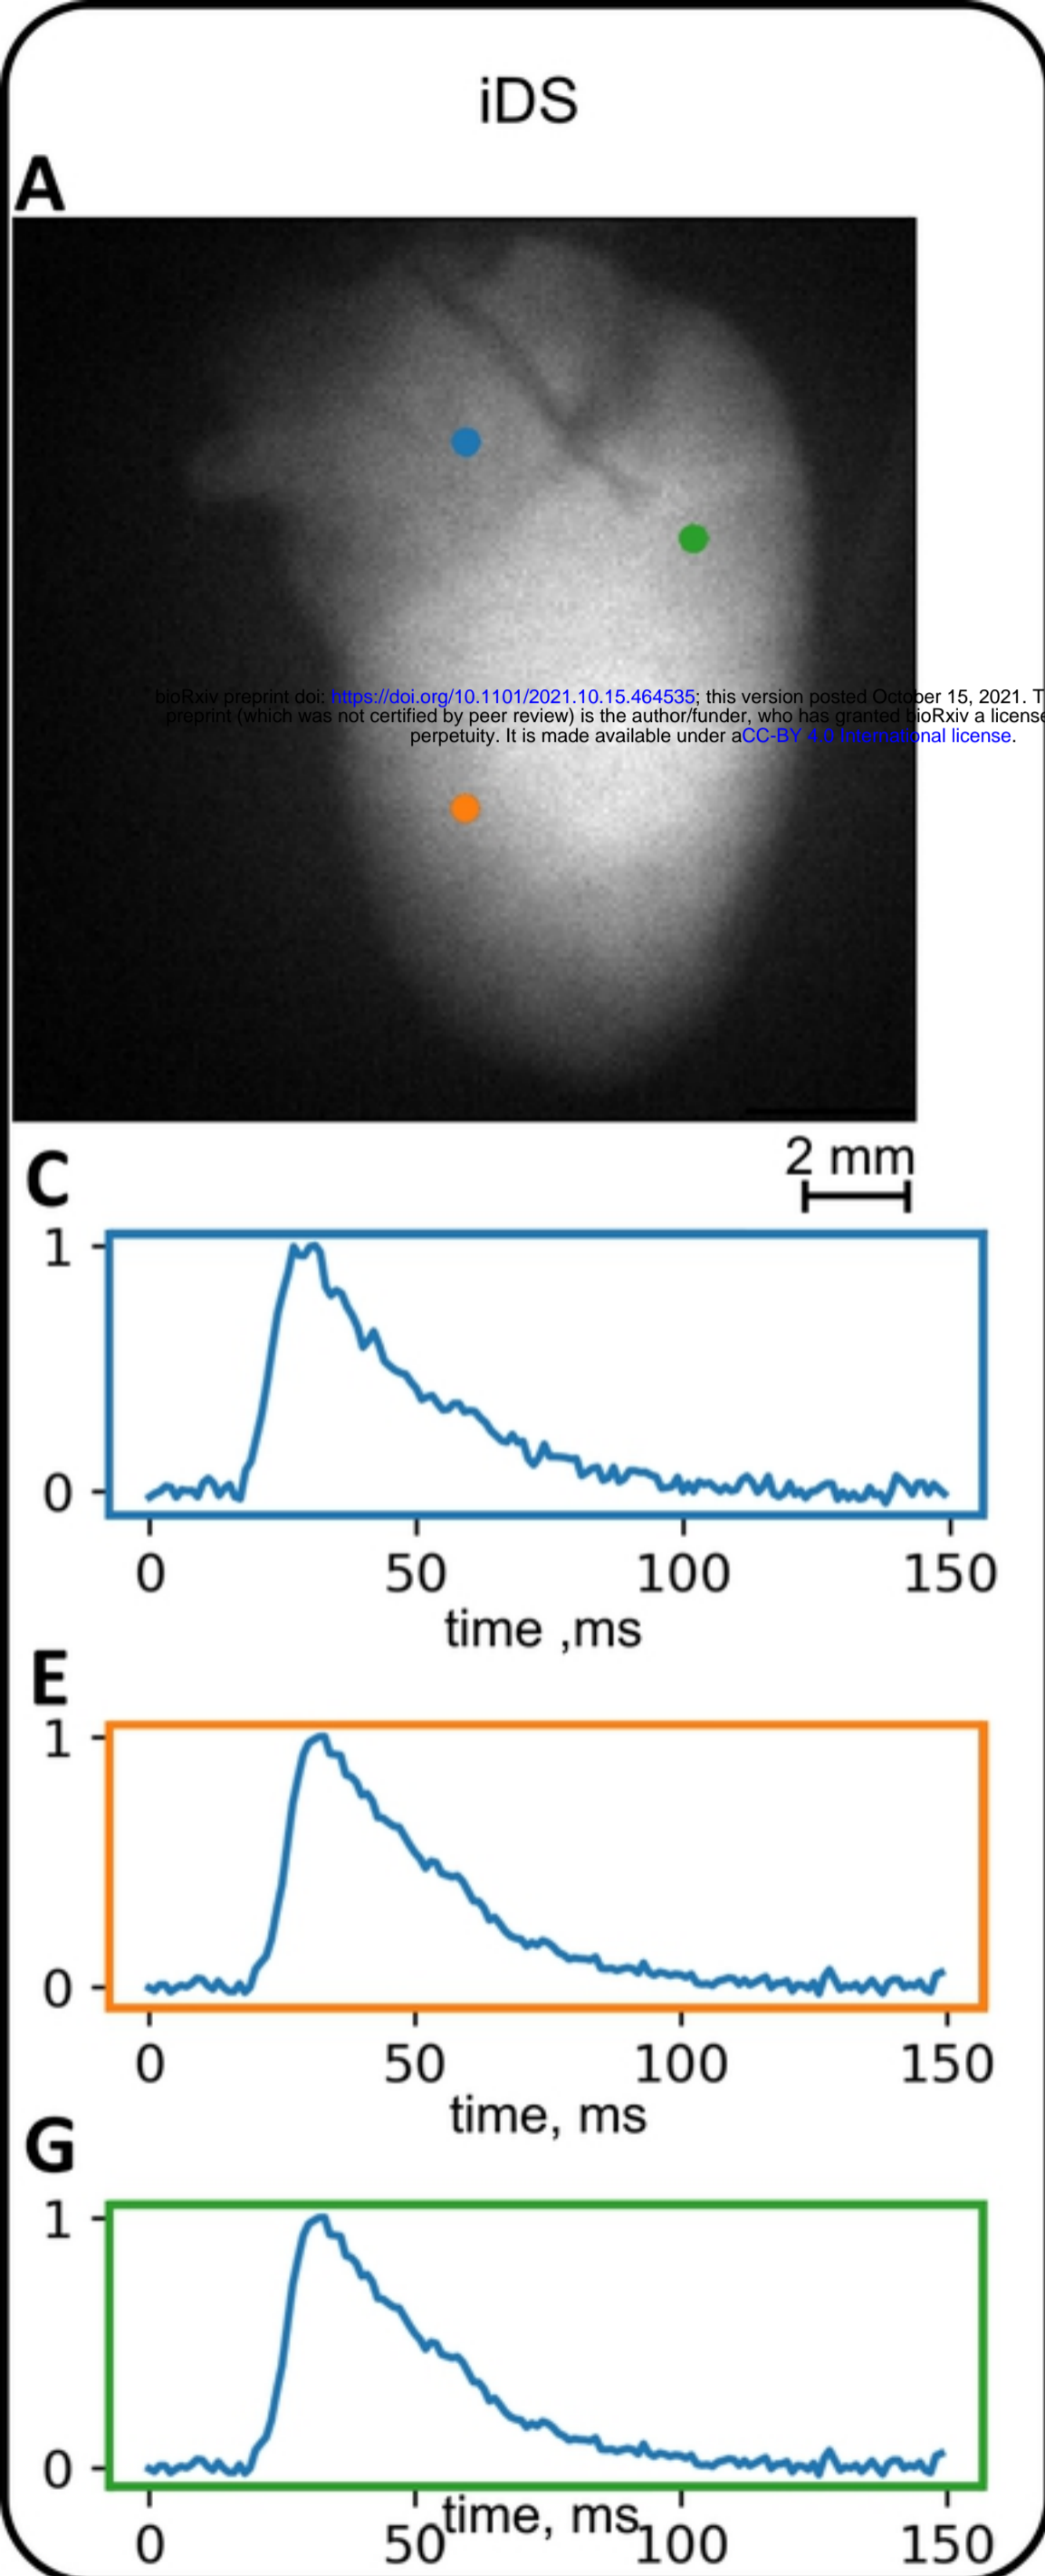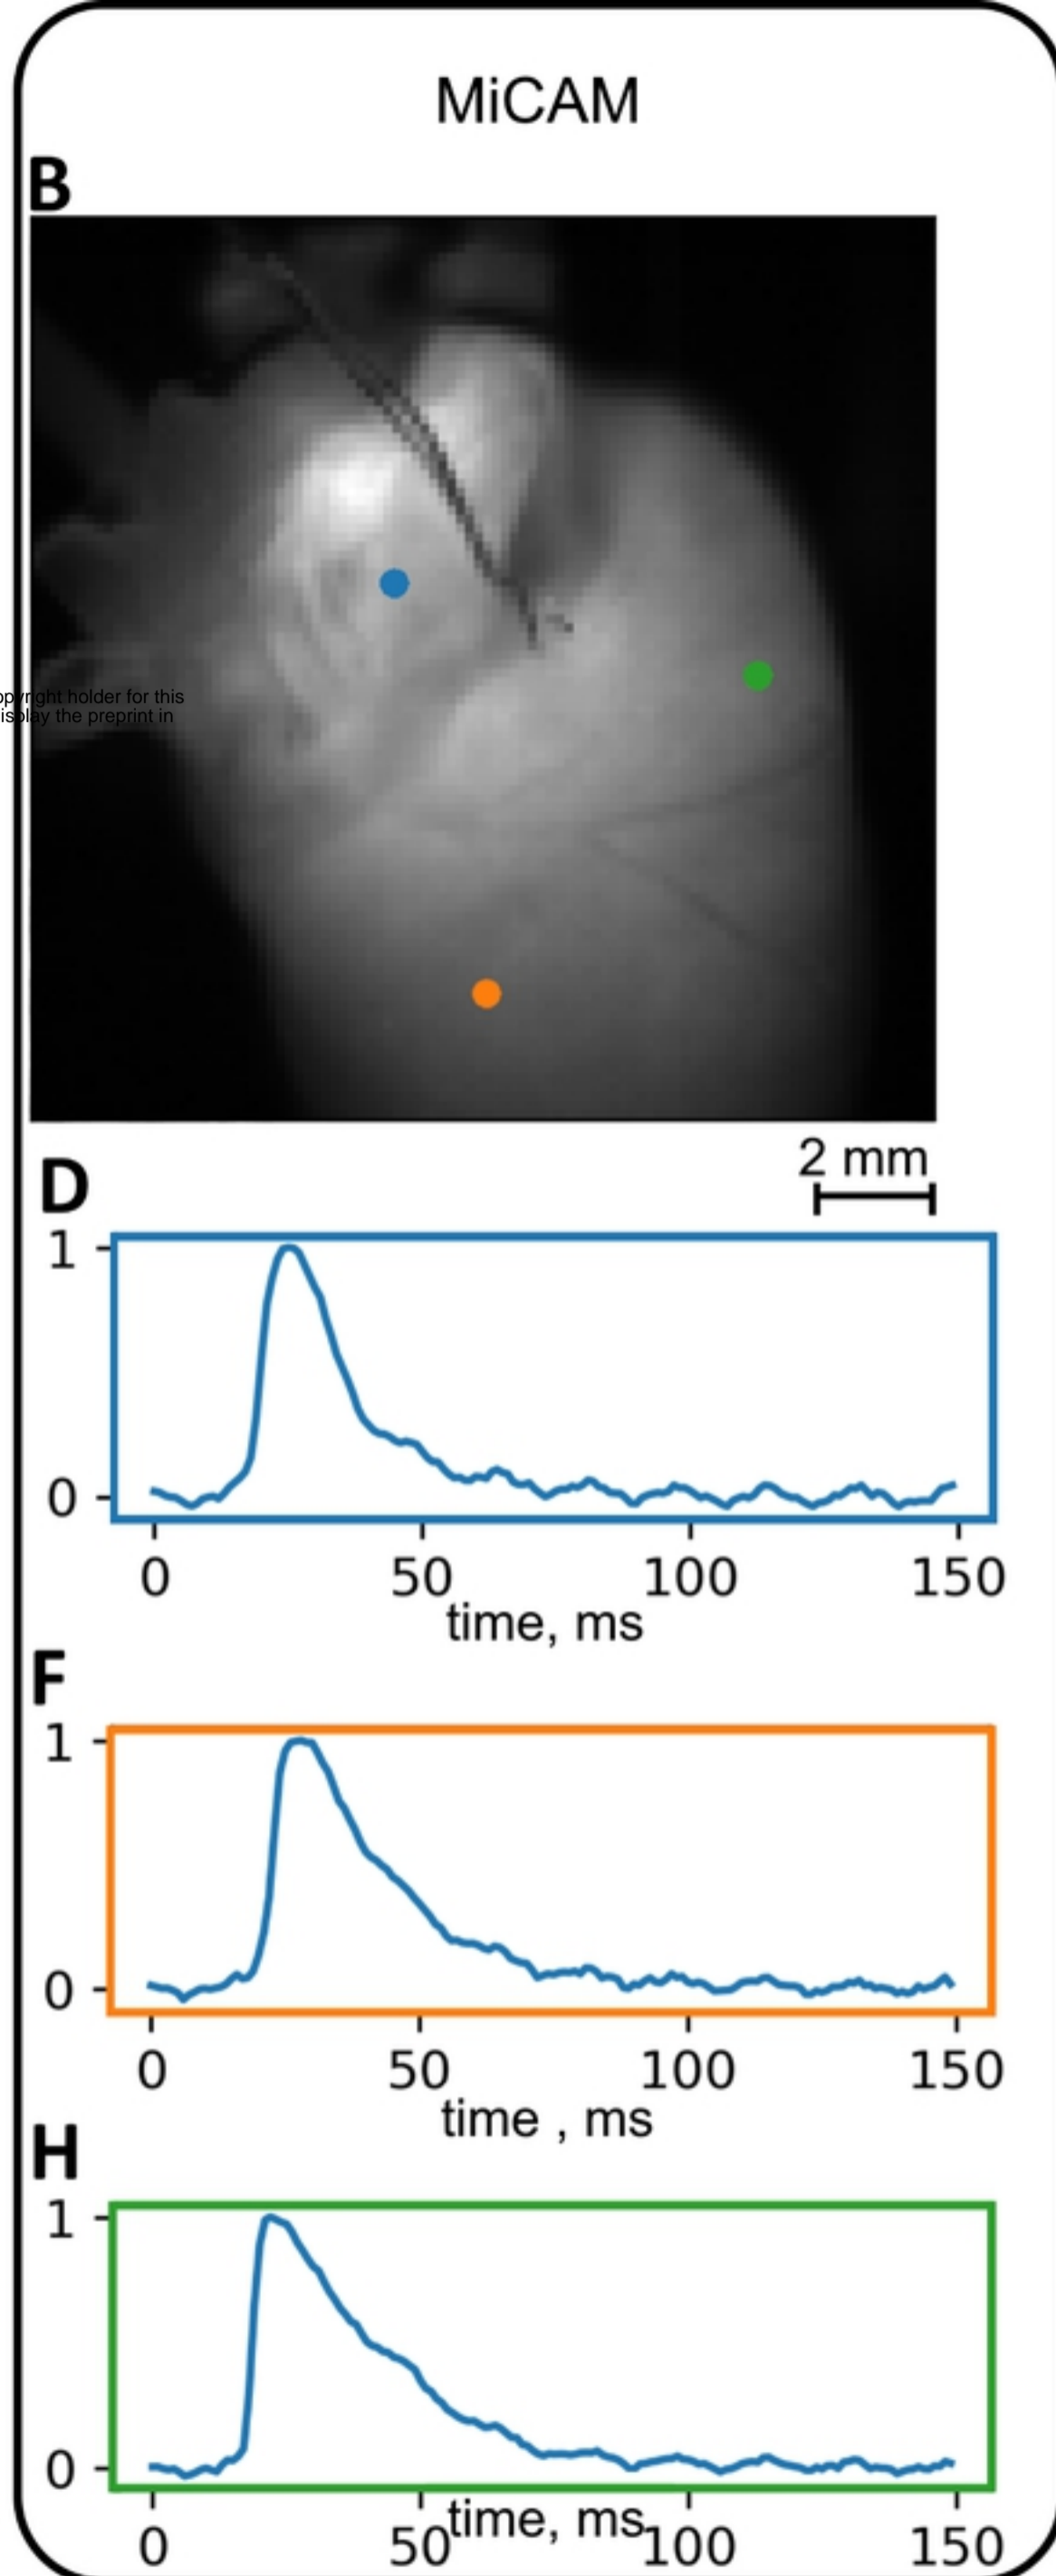

Figure 4

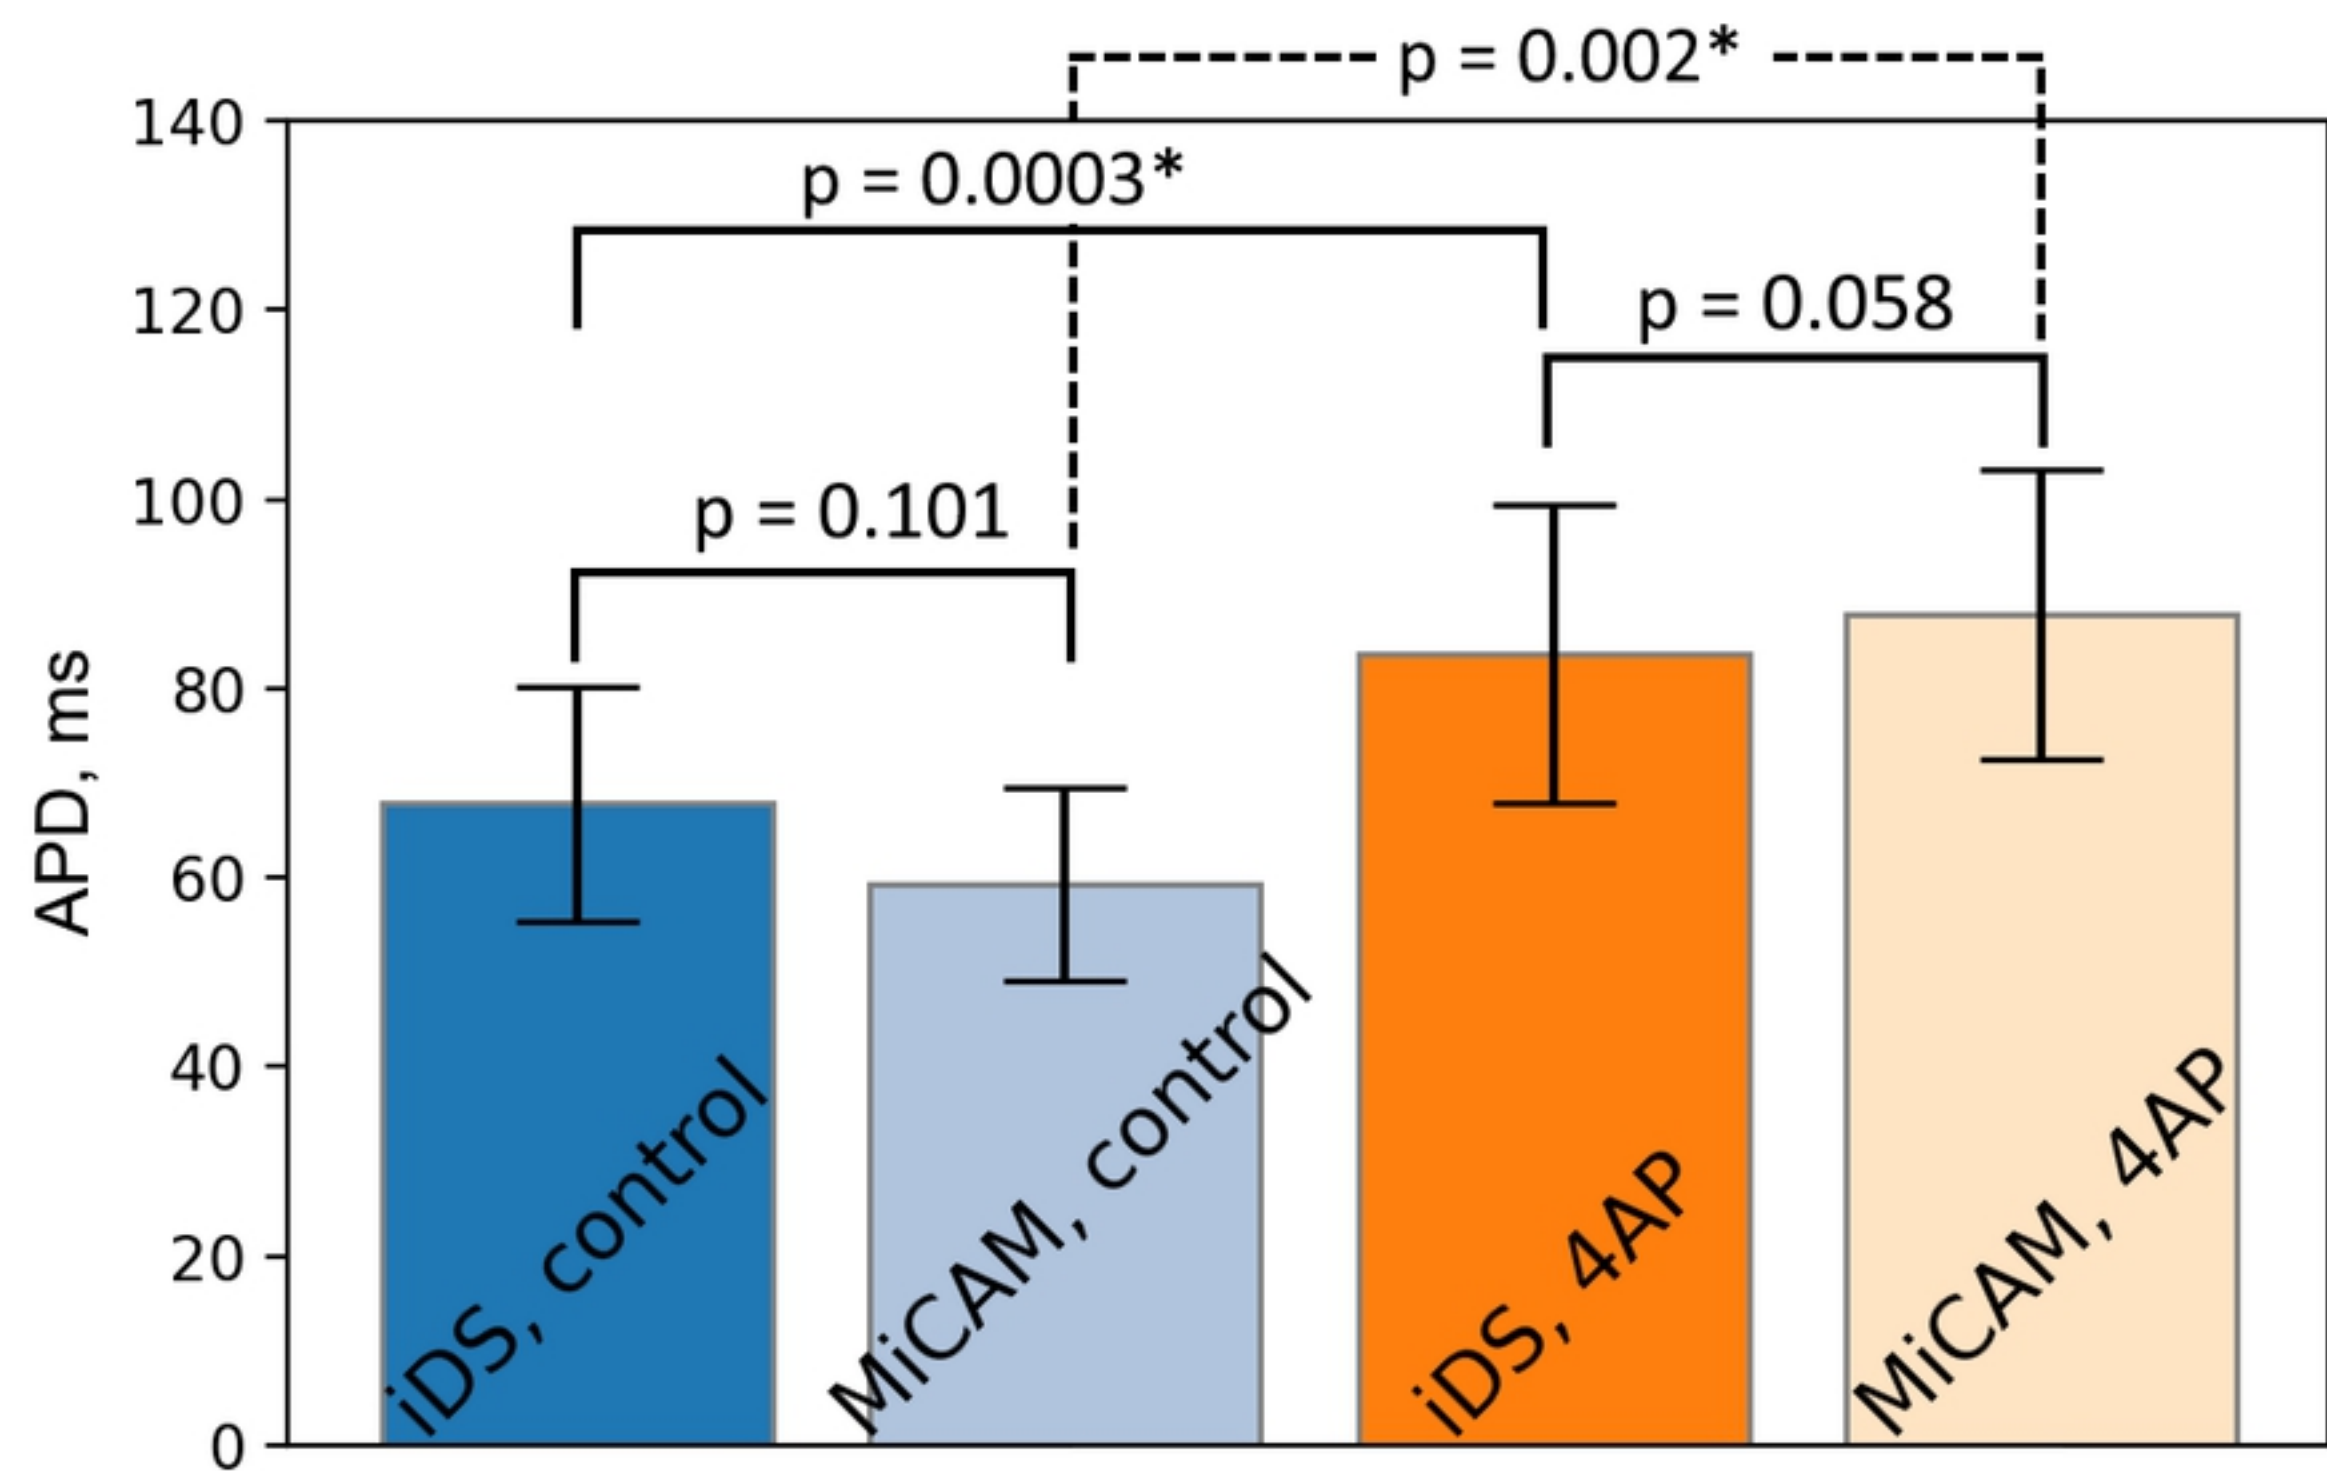

Figure 5

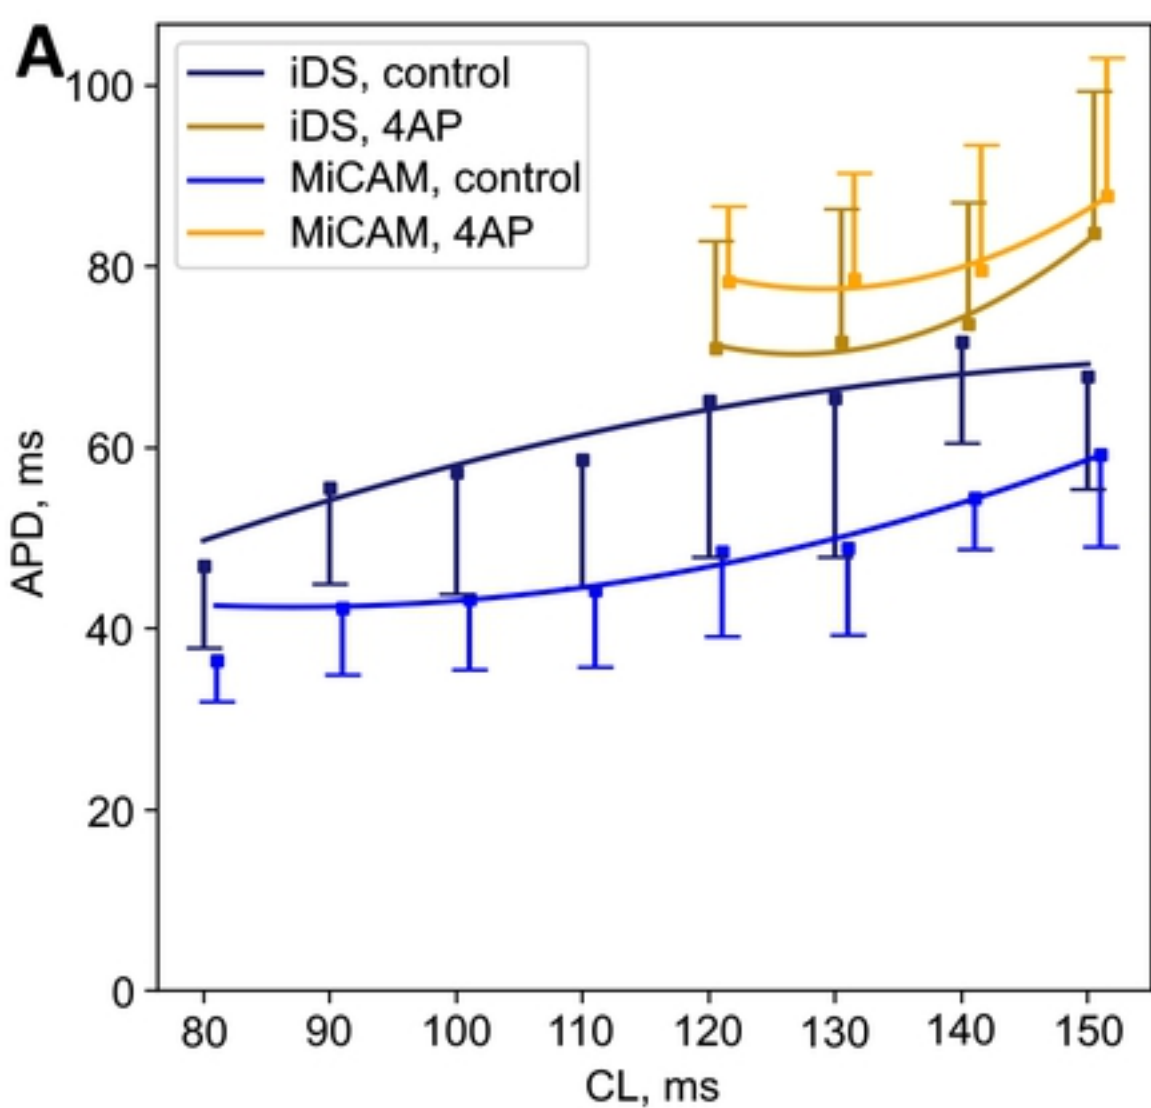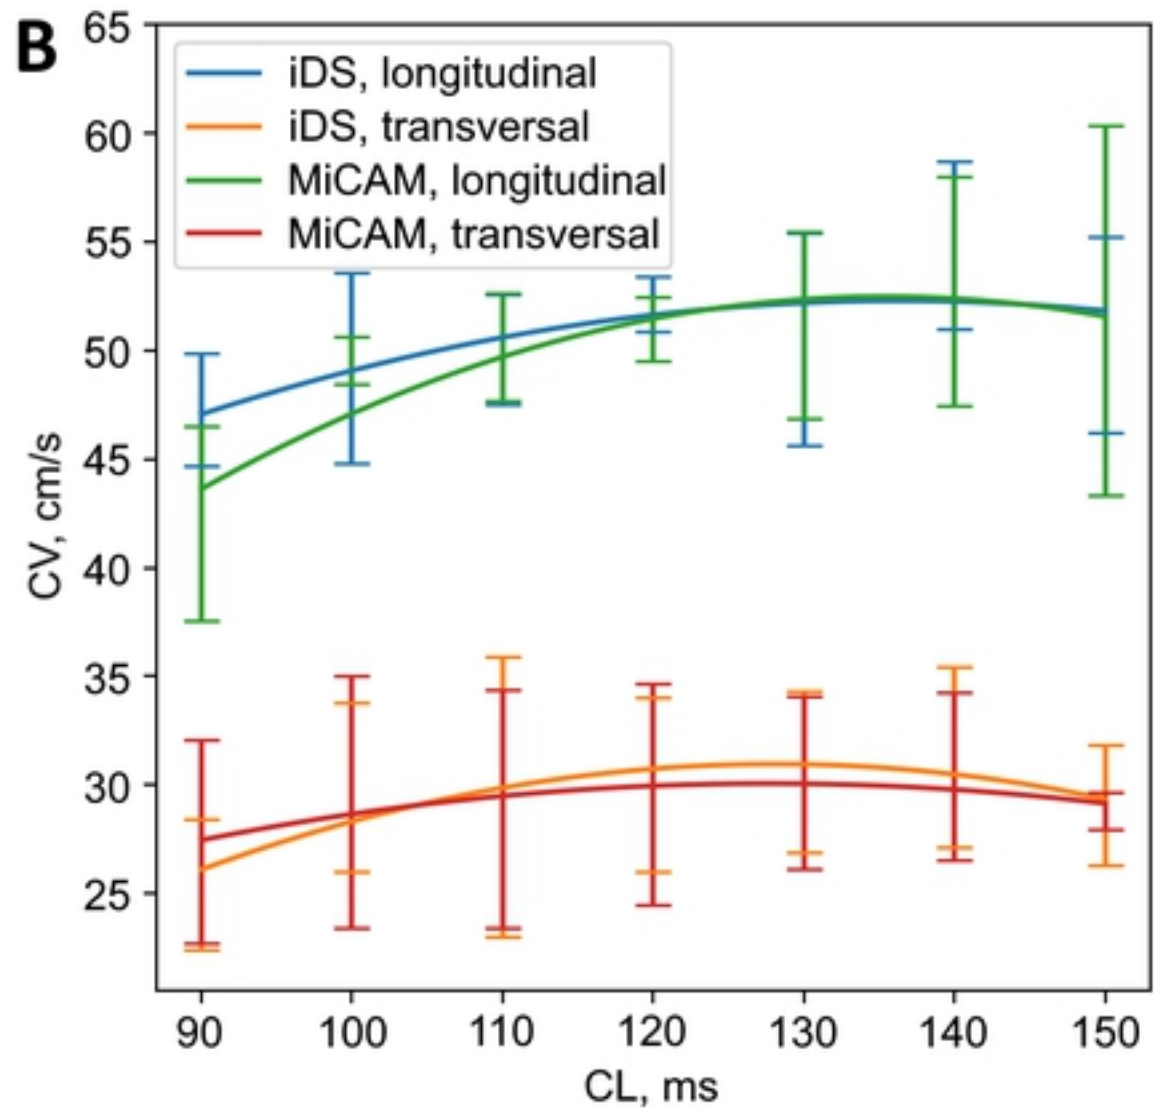

Figure 6

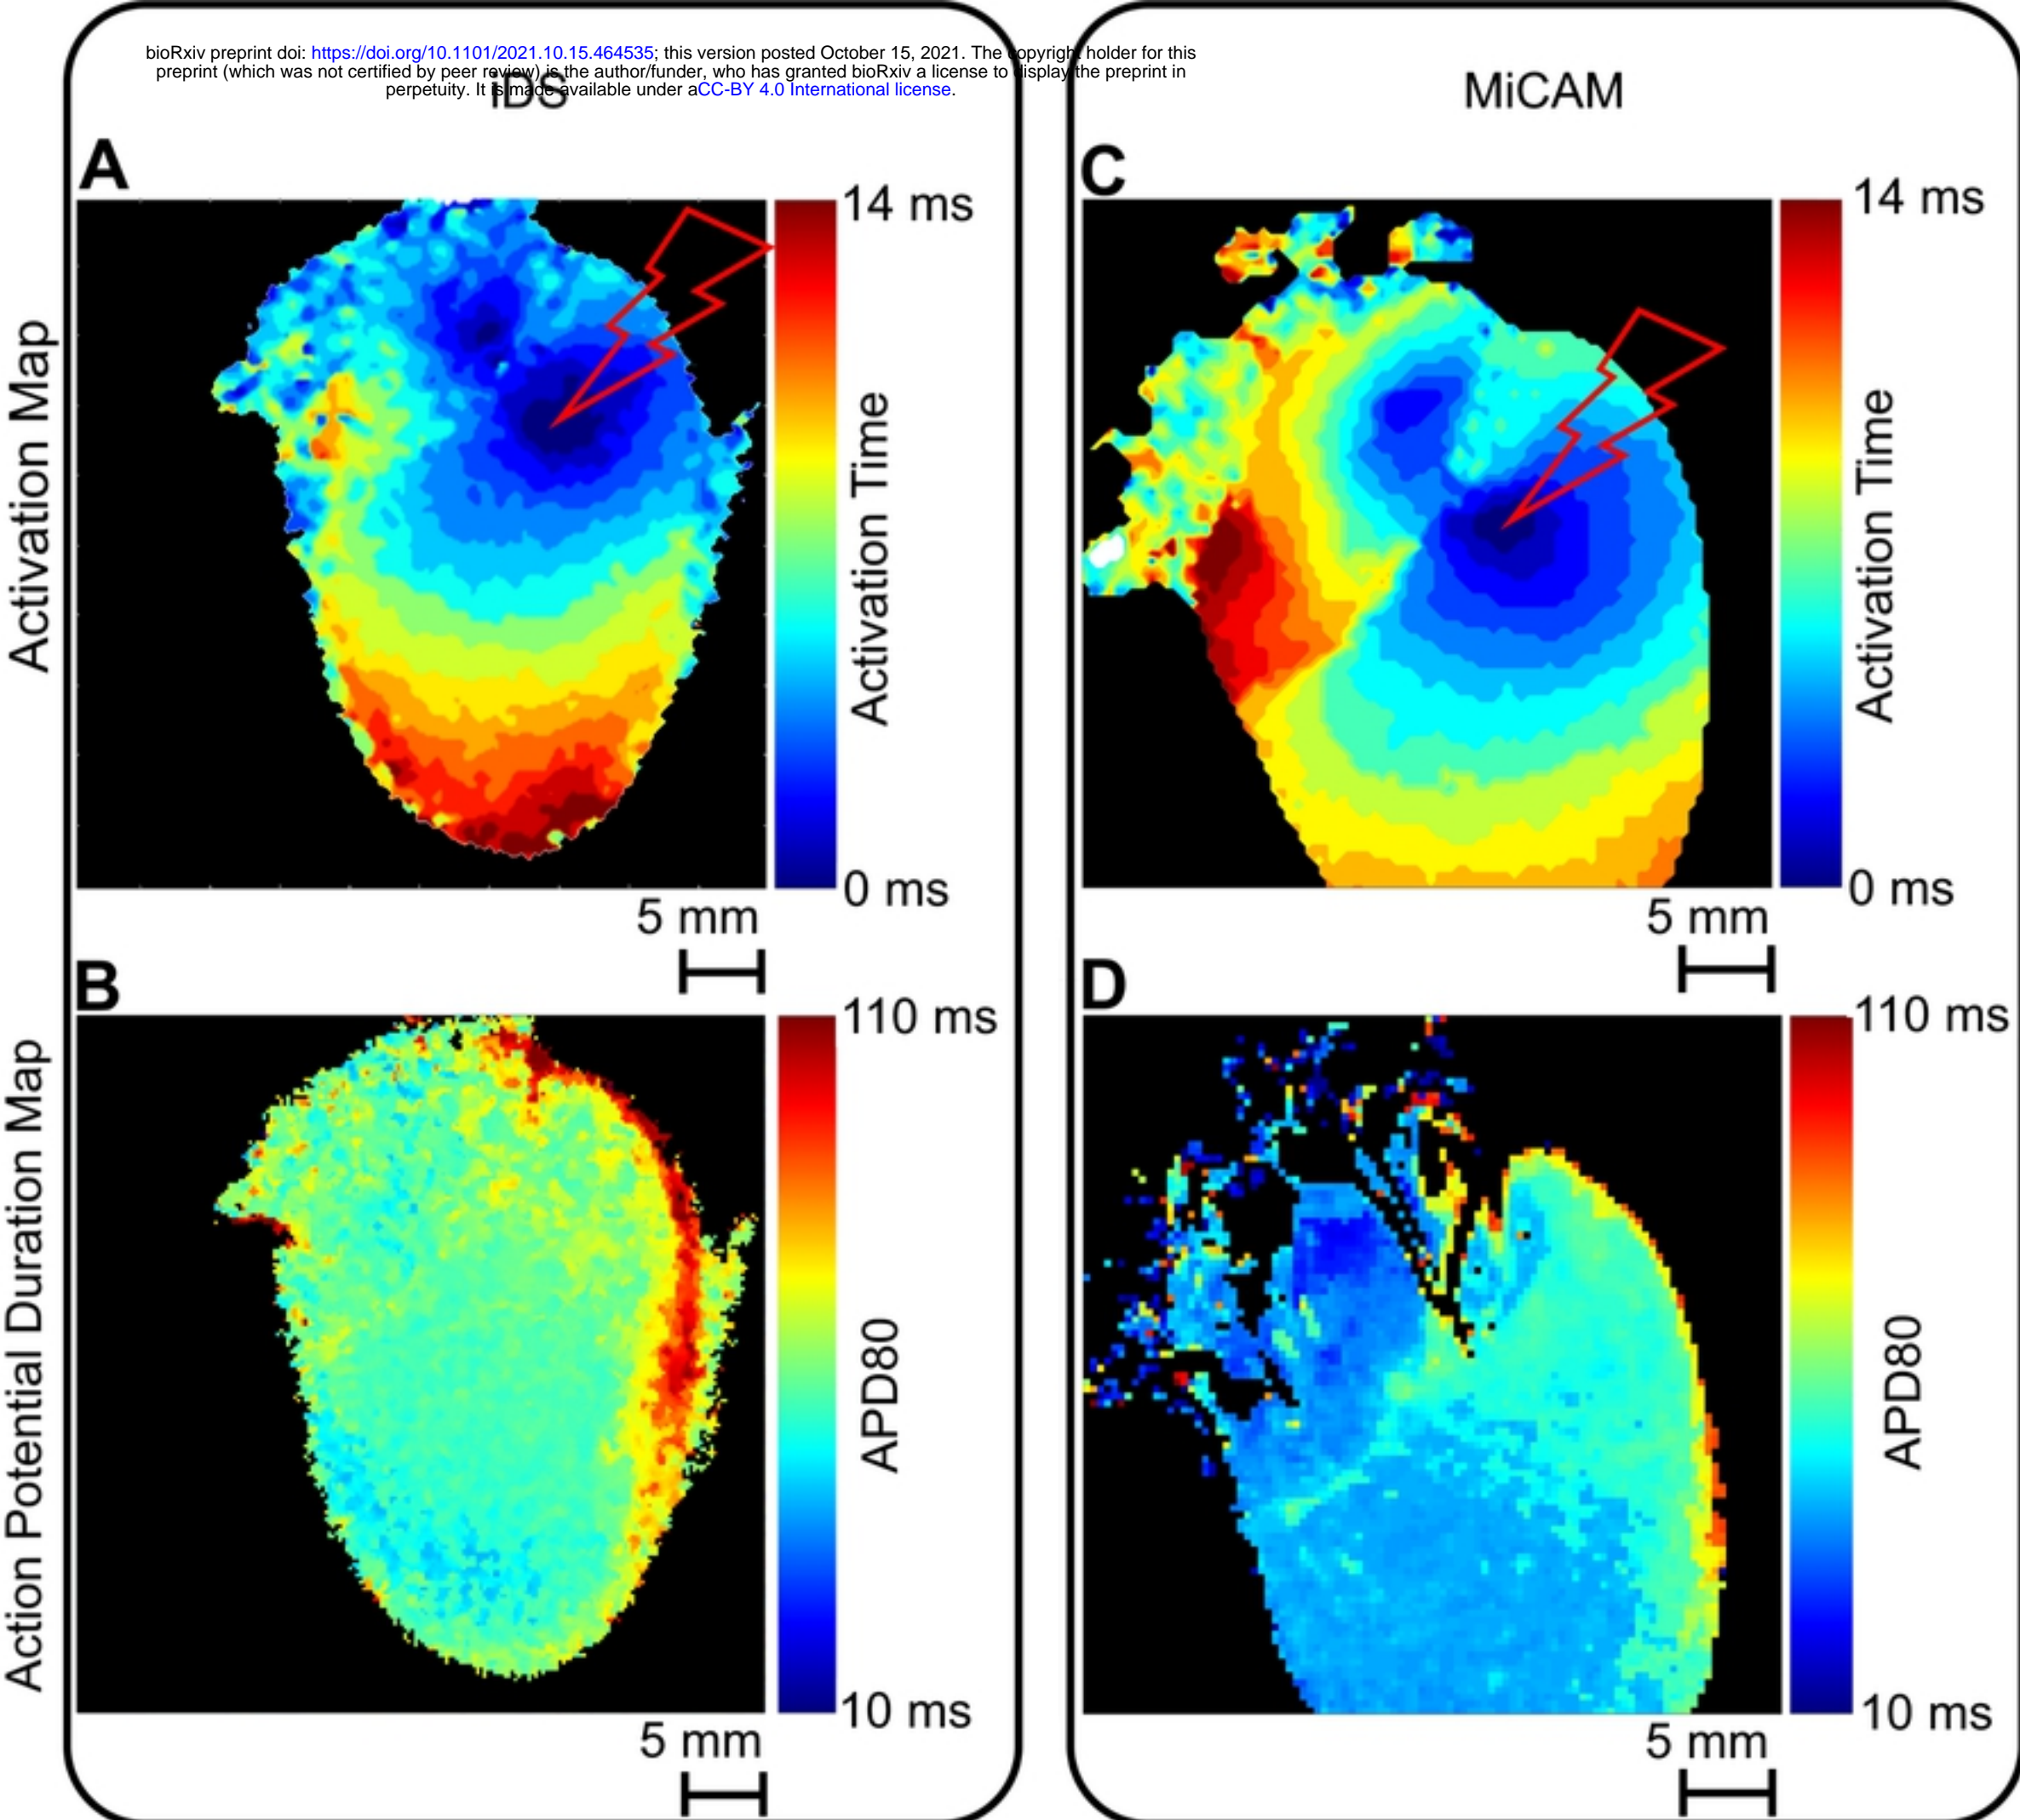

Figure 8

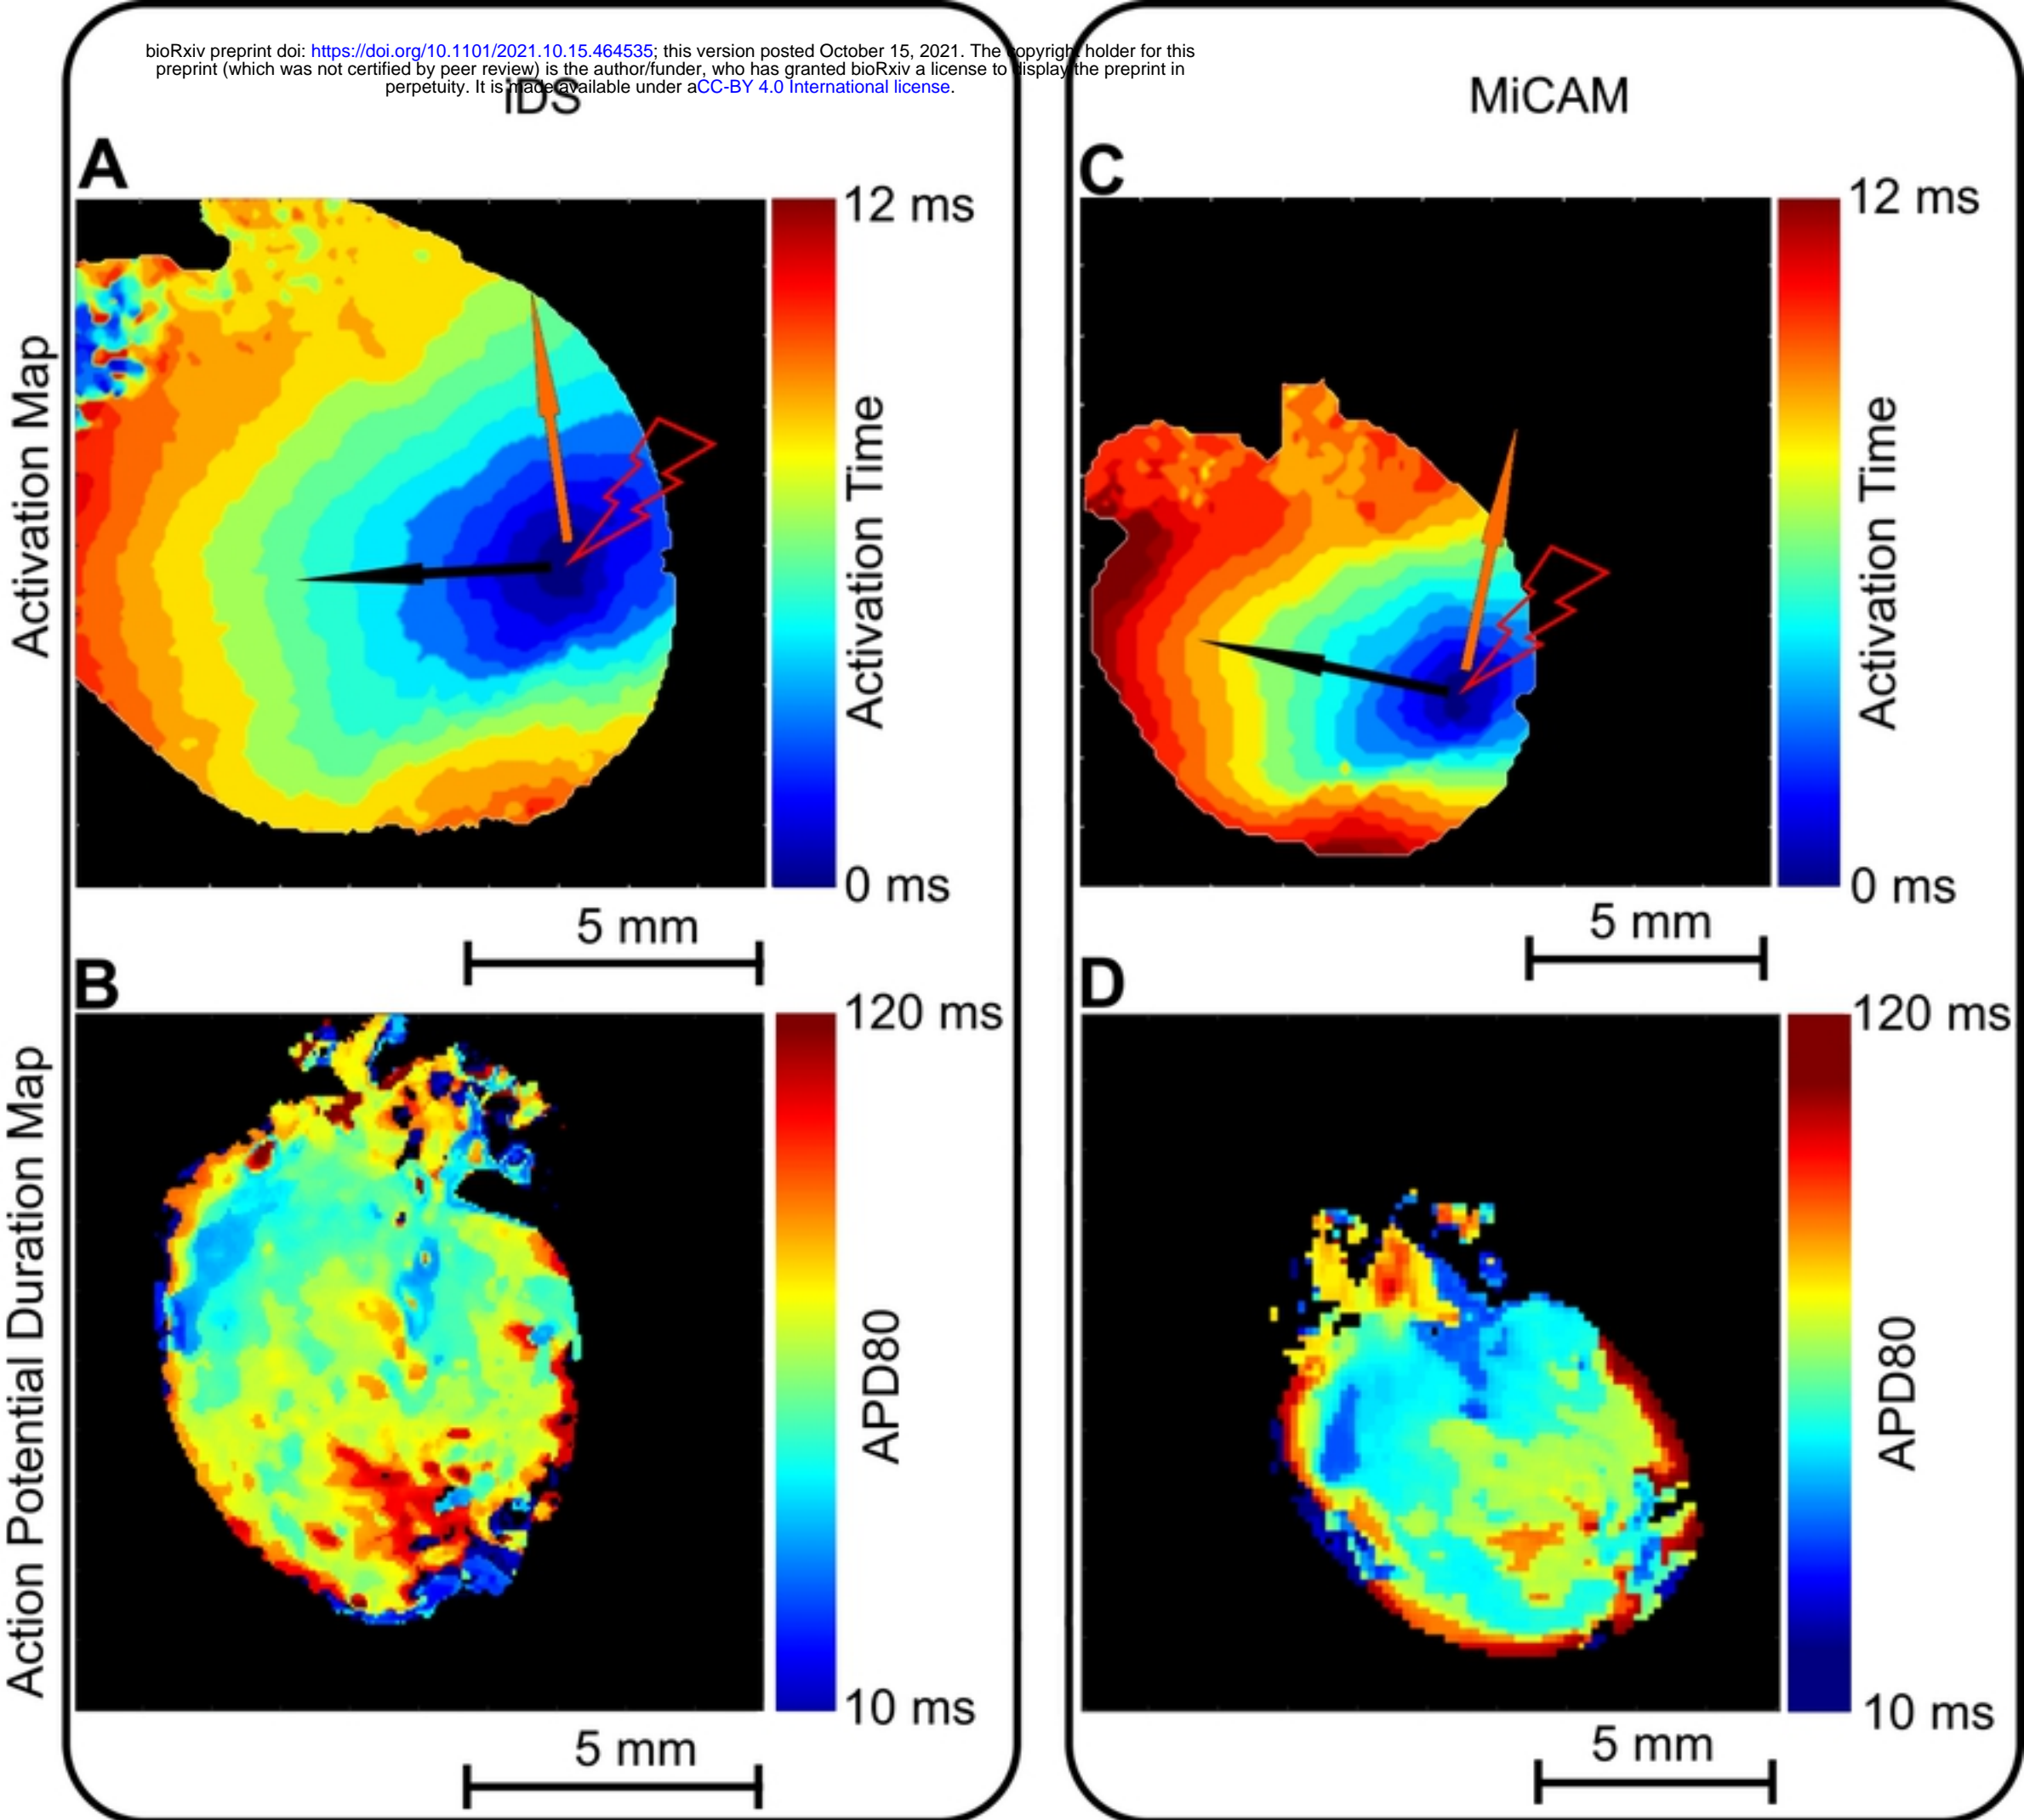

Figure 7
